# Supplementary material
Source: PubMed Central journal article supplement (PMC3545816)
Supplement: 1212709110_sapp.pdf [file 1212709110_sapp.pdf]

## Supporting Information

### **Laccase detoxification mediates the nutritional alliance between leaf-cutting ants and fungus-garden symbionts**

**Authors:** Henrik H. De Fine Licht\*, Morten Schiøtt, Adelina Rogowska-Wrzesinska, Sanne Nygaard, Peter Roepstorff and Jacobus J. Boomsma

\*Correspondence to: [Henrik.de\\_fine\\_licht@biol.lu.se](mailto:Henrik.de_fine_licht@biol.lu.se)

#### **Table of contents:**

|                               |    |
|-------------------------------|----|
| • Materials and methods ..... | 2  |
| • Additional analysis.....    | 11 |
| • References .....            | 12 |
| • Tables (S1-S9).....         | 14 |
| • Figures (S1-S8) .....       | 25 |

## Materials and methods

### *Biological material*

The fungus-growing ant mutualism has a single origin ca. 50 million years ago (mya) when the ants started to cultivate a basidiomycete fungus (Agaricaceae: Agaricales) in underground gardens as a stable source of food. The clade now comprises more than 230 species divided in 15 genera that vary greatly in colony size, social complexity and fungus culturing behaviour (1). Within this clade, the leaf-cutting ant genera *Atta* and *Acromyrmex* evolved only 8 – 12 mya as a major evolutionary transition that coincided with a significant increase in worker polymorphism, a shift to rearing a single fungal cultivar species (*Leucocoprinus gongylophorus*), an increase in mature colony size (ca. 500-100,000 workers in *Acromyrmex* and several million in *Atta*), and a major change in diet to using fresh leaves as the predominant fungal substrate (1). In addition, leaf-cutting ant queens evolved multiple mating (2) and workers evolved larger metapleural glands (3). These modifications form a remarkable contrast with the other higher attine ant genera (*Trachymyrmex* and *Sericomyrmex*), which have much smaller mature colony sizes (ca. 50-3000), monomorphic workers, singly mated queens, and primarily collect dry leaf litter, insect feces, fallen fruits, flowers and only occasionally leaves. A characteristic synapomorphy for all higher attine ant agricultural systems is that they cultivate fungi with specialized inflated hyphal tips (gongylidia) (1), which implies that the attine symbiosis became obligatorily interdependent for both the ants and the fungi (4). In contrast, the remaining 11 fungus-growing ant genera collectively termed the lower attine ants are characterized by cultivation of a wider spectrum of fungal cultivars from either of two unrelated lepiotaceous clades (clade 1 and 2) (1, 4). Within the lower-attine ants two exceptions to this coevolutionary pattern are known: some species in the genus *Apterostigma* cultivate pterulaceous fungi completely unrelated to the lepiotaceous fungi in clade 1 and 2 and certain species in the genus *Cyphomyrmex* cultivate their lepiotaceous cultivars in yeast form, in contrast to all other known fungus-growing ants that cultivate their fungus garden as mycelium (1, 4).

For the present study ant colonies were collected in Parque Nacional Soberanía, Panama (the Gamboa area and forest along Pipeline Road) during 2005-2008, transported to the University of Copenhagen, Denmark and maintained as laboratory colonies at ca. 25 °C and 70% humidity. Colonies were fed a combination of fresh bramble leaves, rice, oatmeal, oak catkins, orange peel, withered flowers, apples and occasionally other fruit items in different proportions adjusted to mimic the natural diet for each species as closely as possible. Laccase activities were measured in the fungus gardens of ant species belonging to four of the five agricultural groups presently recognised in fungus growing ants (see above): (I) Lower attine ants, which cultivate a variety of *Leucocoprinus* (Agaricaceae, Basidiomycota) fungi from two unrelated clades (clade 1 and 2), represented in our study by the ant species *Myrmicocrypta ednaella*, *Mycocepurus smithii*, *Cyphomyrmex costatus*, *C. longiscapus* and *C. muelleri*. (II) Higher attine ants, which cultivate specialized fungi with gongylidia that evolved from clade 1 ancestors, represented here by

*Sericomyrmex amabilis*, *Trachymyrmex cornetzi*, and *Trachymyrmex* sp. 3 (tentatively also called *isthmicus* or “blackhead”). This *Trachymyrmex* species is an undescribed member of the *T. zeteki/opulentus* species-complex of closely related species that awaits formal revision. (III) Leaf-cutting ants, which are a derived clade of higher attine ants that all cultivate a single species, *L. gongylophorus*, represented here by *Atta colombica*, *At. cephalotes*, *Acromyrmex echinator*, and *Ac. octospinosus*, and (IV) The *Apterostigma* (lower attine) agricultural group that cultivates a pterulaceous basidiomycete fungus only distantly related to the leucocoprinaceous clade 1 and 2, here represented by *A. collare* and *A. dentigerum*. The fifth category of fungus farming, the *Cyphomyrmex* species that cultivate clade 1 symbionts as yeasts were not included. Fungal clade affiliation (clade 1 or 2) could be inferred from the literature for most lower attine species, except for *Mycocepurus* and *Myrmicocrypta* fungus gardens. In these species, fungal cultivars were genotyped to establish clade identity as previously described (5). Due to mortality of colonies not the exact same *A. echinator* colonies were available for all experimental and molecular measurements conducted.

#### *Gongylidia abundance in fungus gardens*

Fungus garden samples from *A. echinator* laboratory colonies (Ae331, Ae335, Ae447, Ae490) were collected from five consecutive sections (layers) measured as the distance from the top of the fungus garden (0 – 2.5 cm, 2.5 – 5 cm, 5 – 7.5 cm, 7.5 – 10 cm, and 10 – 12.5 cm). Using a stereomicroscope at 40x magnification a small 3x3mm square (9mm<sup>2</sup>) was randomly placed on the fungus garden and the number of gongylidia clusters (staphylae) within this area was counted. This was done ten times for each section and the number of staphylae in each section was determined as the average number of all ten measurements. Repeating these measurements for each of the five layers resulted in 50 measurements of each of the four colonies. Numbers were converted to gongylidia clusters (staphylae) per cm<sup>2</sup>.

#### *Enzyme extraction*

Fungus garden enzymes were extracted from 50 mg fresh fungus garden material from laboratory colonies. Each sample was homogenized and total enzymes extracted in 200 µl of cold 0.1 M Citric acid – sodium citrate buffer (pH = 5.5) followed by centrifugation at 15,000g for 15 min at 4 °C. Supernatants were collected on ice and immediately processed for laccase activity measurements. The four leaf-cutting species were analysed in more detail by collecting and measuring 50 mg fungus garden samples from the three different sections (top, middle, and bottom) corresponding to different stages in substrate degradation. This is because leaf-cutting ant gardens grow at the top while the ants discard the bottom section of the fungus garden where substrate depletion has progressed so far that further maintenance is unproductive (6). Leaf-cutting ant gardens in the field often clearly show the stratification in three distinct sections that reflects the fungal/substrate biomass ratio. Our laboratory rearing procedures where gardens grow under inverted 1 liter plastic beakers accentuate this gradient by constraining the ants to always add substrate at the top and remove depleted fungus garden material at the bottom.

Fecal droplet enzymes were extracted from live *A. echinator* workers maintained in laboratory colonies on a diet of bramble leaves and fungus garden and from “starved” workers maintained on a diet of bramble leaves and sugar water with no fungus garden for 14 days. Fecal droplets were collected as previously described (7). Briefly, a live worker was held by forceps on a glass plate and with a second pair of forceps pressed down and gently squeezed on the gaster until a fecal droplet (ca. 0.1 - 0.2  $\mu$ l) was expelled. The droplet was immediately suspended in 4.8  $\mu$ l ddH<sub>2</sub>O to prevent evaporation. Droplets from five individual workers of each dietary scheme were collected and measured separately for three *A. echinator* colonies.

#### *Laccase activity*

Total activity of laccase was measured with Syringaldazine (Sigma-Aldrich Denmark A/S, #S7896). 10  $\mu$ l of a 16.65 mM Syringaldazine solution (6 mg/mL) in ethanol was mixed on ice with 85  $\mu$ l 0.1 M Citric acid – sodium citrate buffer (pH = 5.5). Five  $\mu$ l enzyme extract was added yielding a total assay volume of 100  $\mu$ l and measurements were started immediately by scoring absorbance at 530nm every 10 sec for 10 min on a Versamax plate reader (MDS Analytical Technologies, Sunnyvale, California) at 25 °C. Laccase enzyme from the basidiomycete *Agaricus bisporus* (Sigma-Aldrich Denmark A/S, #40452) was used as a positive control to confirm the assay parameters. Laccase activity was measured as optical density/min during the phase of linear increase in activity as previously reported (8), and unit activity was calculated using the molar absorption coefficient for Syringaldazine of ~65.000 L/mol/cm (9). One unit (U) of activity was defined as the amount of enzyme that oxidizes 1 nmol/min.

#### *Laccase activity analysis*

Laccase activities were analysed with ANOVA and means compared with Tukey’s correction for multiple comparisons using SAS v. 9.1 for Windows. Fungus garden laccase activity differed significantly between species ( $F_{13,39} = 19.48$ ,  $p < 0.0001$ , Fig. 2A) and analysis of Tukey’s corrected means showed that this was primarily due to the much higher laccase activity in leaf-cutting ant fungus gardens (Fig. 2A, except for *A. cephalotes* gardens, which had enhanced laccase activity but to a lower extent that was not significantly different from all non-leaf-cutting ants). Tests for serial independence (TFSI) of laccase activity were performed using Phylogenetic Independence v. 2.0 (10) and showed a significant association of fungus garden laccase activity with the phylogenetic branching of both the ants ( $C = 0.55$ ,  $p = 0.007$ ) and the symbiotic fungi (clade 1 only,  $C = 0.63$ ,  $p = 0.008$ ). Therefore the data were analysed using phylogenetically independent contrasts to control for shared traits among related species/genera. We focused on the specific phylogenetic contrasts of leaf-cutting ants versus all other attine ants, both when using the phylogeny of the ants and the phylogeny of the fungal cultivar (Clade 1 only). The most recent phylogenies for fungus-growing ants (1) and the fungal cultivars (4) were used. Species not present in these phylogenies were assumed to be in clades of the closest relatives with branch lengths assumed to be equal to sister species. Categorical variables (leaf-cutting ants versus all other attine ants) were replaced by 0-1 dummy variables to perform the



respective regression analyses. Independent contrast analyses were evaluated using the PDAP (Phenotypic Diversity Analysis Programs) program package for Mesquite ver. 11 (11, 12). The change in fungus garden laccase activity remained significantly correlated with the transition from higher attines to leaf-cutting ants ( $F_{1,12} = 9.42$ ;  $p = 0.0097$ ) using the ant phylogeny. However, performing the same analysis using the Clade 1 fungal phylogeny showed no significant correlation between laccase activity and the transition from higher-attines to leaf-cutting ants ( $F_{1,7} = 0.004$ ;  $p = 0.953$ ) which was likely due to the longer branch lengths in the fungal phylogeny reducing the power of the regression analysis.

The putative evolutionary trajectory of laccase activity based on the fungal phylogeny for clade 1 (4) was estimated using a maximum likelihood approach as implemented in the BayesTraits program (13). The constant-variance random walk model of evolution was used in the maximum-likelihood analysis, because there was no indication of a directional random walk model giving a better fit to the laccase activity data (likelihood ratio,  $LR = 0.02$ ,  $p = 0.9203$ ). The model estimated a punctuated evolutionary trajectory ( $\kappa$  estimate = 0.0) with longer distances (from root to tip) in the fungal phylogeny contributing proportionally more ( $\delta$  estimate = 2.9) to laccase activity evolution. This would indicate that recent phylogenetic changes (i.e. species-level transitions) may explain most of the evolution of laccase activity independent of overall branch lengths and larger-scale episodes of accelerated evolution. However, none of these estimates were significant ( $p > 0.50$ ) in likelihood ratio tests of alternative models, so this analysis merely characterized the optimal parameter values in the evolutionary model that described the data best.

#### *Laccase protein sequencing and analysis*

To obtain fungal laccases that are active and transferred via ant fecal droplets, the fecal droplet proteome was separated on a SDS-PAGE gel and the individual bands cut out and sequenced using MALDI TOF and tandem mass-spectrometry. The methodology is described in detail in (7). Briefly, 50 fecal droplets from *A. echinator* workers (colony Ae263) were collected and combined in 2 x SDS-PAGE loading buffer (100 mM Tris-HCl, pH 6.8, 200 mM dithiothreitol, 4% SDS, 0.2% bromophenol blue, 20% glycerol) and separated on a 12.5% polyacrylamide gel. The gel was stained (0.25% Coomassie Brilliant Blue R250, 0.44% ethanol, 9.2% acetic acid) and visible bands were excised individually. Proteins in gel bands were subjected to in-gel protein digestion using trypsin following previously described protocols (7, 14). The resulting peptide mixtures were desalted on custom-made reverse-phase microcolumns, prepared with R2 resin (Perseptive Biosystems Inc., Framingham, MA, USA) and were eluted with 0.8  $\mu$ L of matrix solution (5  $\mu$ g/ $\mu$ L of  $\alpha$ -cyano-4-hydroxycinnamic acid in 70% acetonitrile and 0.1% TFA) directly onto the matrix assisted laser desorption ionization (MALDI) target plate. Peptide mass spectra were obtained in positive reflector mode on a 4800 Plus MALDI-TOF/TOF™ Analyzer (Applied Biosystems, Foster City, CA, USA) using 20 kV of acceleration voltage. Each spectrum was externally calibrated with peptides derived by tryptic digestion of  $\beta$ -lactoglobulin

and tandem mass spectra were acquired using the same instrument in MS/MS-positive mode. Because no protein identification could be obtained by searching protein sequence databases at the National Center for Biotechnology (NCBI Prot., April 2008) manual *de novo* sequencing was performed on the basis of the presence of b and y peptide fragment ions in MS/MS spectra (15). To facilitate the process, samples were derivatised by adding 7  $\mu$ L of 10  $\mu$ g/ $\mu$ L 4-sulfophenyl isothiocyanate dissolved in 50 mM NaHCO<sub>3</sub>, pH 8.6. The reaction was allowed to proceed for 30 min. at 50°C and terminated using 1  $\mu$ L of 1% TFA. The mixture was then desalted and eluted directly on the target and analyzed using 4800 Proteomics Analyzer (Applied Biosystems, Foster City, CA, USA) in MS/MS mode. Derived peptides (showing a mass difference of 215 Da compared to the original MS spectra) were sequenced using the same instrument in MS/MS-positive mode. The obtained MS/MS spectra from underivatized and derivatized samples were analyzed manually supported by the AminoCalc program (Protana A/S, Odense, Denmark) to find the distance between fragment ions and to obtain amino acid sequences. The observed similarity between peptide mass spectra and cDNA sequences (96%, 2 out of 51 aa, Fig. 3A) was not 100% because of some variation between samples used for fecal droplet proteome and cDNA analysis.

#### *RNA isolation*

Using a stereo microscope, gongyliidial clusters (staphylae) and mycelium were collected from fungus garden fragments in the middle section of fungus gardens and put immediately in liquid nitrogen. The two different tissue types were sampled right next to each other to minimize variation in age and kind of substrate supporting these different types of hyphae. RNA was isolated from the fungal symbiont *L. gongylophorus* from laboratory *A. echinator* maintained fungus gardens using a modified protocol of the RNeasy Plant Mini Kit (Qiagen, Hilden, Germany, # 74104). The fungal material was disrupted with a FastPrep® sample preparation machine (Qbiogene, MP Biomedicals, Santa Ana, California) at 4.5m/sec for 45 sec in 500  $\mu$ L RLC lysis buffer, 5  $\mu$ L  $\beta$ -mercaptoethanol, and glassbeads. The RNA was extracted twice with an equal amount of phenol/chloroform/isoamyl alcohol (25:24:1), pH 8, followed by one extraction with chloroform/isoamyl alcohol (24:1). The final extract was then purified using the RNeasy Plant Mini Kit including an on-column DNase I treatment step as described in the protocol (Qiagen, Hilden, Germany, # 79254). cDNA was generated with standard oligo-dT primers and Superscript III reverse transcriptase (Invitrogen, Carlsbad, CA, USA, #18080-051) following the manufacturers descriptions and used as template for subsequent PCR reactions unless otherwise stated.

#### *Gene finding*

The obtained laccase amino acid sequences were used to design two laccase specific degenerate primers Sp1-F1 and Sp3-R1 (Table S1), which were used in combination with a RACE strategy to sequence the full length gene product of *LgLcc1*. 3'- and 5' - RACE libraries were made from approximately 1  $\mu$ g of the purified RNA with the SMART RACE cDNA kit (Clontech,

Mountain View, CA, USA), and gene sequences were PCR amplified from these libraries using specific primers designed from the fungal genome sequence along with the primers enclosed in the SMART RACE cDNA kit (Table S1-3). The following PCR scheme was used to amplify the genes: one cycle of 95°C for 4 min, 10 cycles of 94°C for 20 sec, 72°C for 30 sec (with a decrease in temperature of 0.5°C in every cycle) and 72°C for 2 min, followed by 35 cycles of 94°C for 20 sec, 67°C for 30 sec and 72°C for 2 min, and ending with one cycle of 72°C for 7 min. All PCR products were cloned into pCR4-TOPO using the TOPO TA cloning method (Invitrogen, Carlsbad, CA, USA) before sequencing.

To search for further putative laccase-coding genes present in the *L. gongylophorus* genome, the four conserved laccase signature regions L1 – L4 (16) were identified in *LgLcc1* and used as query sequences for a psi-tblastn search strategy. The first psi-tblastn iteration was searched against the non-redundant protein sequence (nr) database in January 2010 and the position specific scoring matrix (PSSM) retrieved. The PSSM was then used to search the raw and unassembled draft genomic sequence information of the fungus *L. gongylophorus* cultivated by another, sympatric colony of *A. echinator* (Ae322). This sequence set was generated using two full 454-sequencing runs and represents 700 Mb of sequence data with an estimated 7x coverage (based on actual observed coverage of known fungal sequences) of the heterokaryotic genome and is part of a genome sequencing project of *L. gongylophorus*, coordinated by Jacobus J. Boomsma, Centre for Social Evolution, Copenhagen University, 2012 (The raw sequence data of the fungal genome have been deposited in the European Nucleotide Archive (ENA) at the EMBL-EBI database under the accession number ERP001825). This yielded 167 unique raw reads that were assembled into 24 contigs using CAP (17). Manual trimming reduced the number of contigs to 14 for which full gene lengths (~2500-3000 bp) were obtained using further local BLAST against the unassembled genome sequence set. Gene prediction was performed with AUGUSTUS (18) using hidden-markov models trained on the agaric basidiomycete *Laccaria bicolor* and gave a final set of 9 putative laccase-coding genes. The high sequence divergence of the identified putative laccase sequences (Figures S3-S5), including a ferroxidase (*LgLcc9*), implies that our search strategy was exhaustive and all putative laccase coding genes should have been identified in the sequence data. To confirm gene prediction all putative laccase-coding genes were sequenced using a combination of specific primers and RACE PCR as described above (for primer sequences see Table S1-3). Potential signal peptide sequences were estimated with SignalP (19) and the subcellular location predicted with TargetP (20, 21).

### *Expression analysis*

Using a stereomicroscope, undifferentiated mycelium and clusters of gongylidia (staphylae) were collected with a fine forceps from fragments of fungus garden belonging to four colonies of *Acromyrmex echinator* (Ae263, Ae280, Ae322, and Ae335) and three colonies of *Trachymyrmex cornetzi* (Tra.sp1.C#004\_270408, Tra.sp1.C#005\_270408Tsp-5, and Tra.sp1.C#010\_010508) that were analyzed separately as biological replicates. The fungus

material was immediately put into liquid nitrogen before RNA extraction (see RNA isolation section above). Expression levels of putative laccase-coding genes in gongylidia and gongylidia-free mycelium were determined using qPCR. cDNA was generated from either 200 ng or 1,000 ng of total RNA from undifferentiated mycelium or staphylae using Superscript III reverse transcriptase (Invitrogen) and an oligo(dT) primer and subsequently diluted with water 8 or 40 times depending on the amount of starting material. 0.5  $\mu$ L template cDNA was used in a 20- $\mu$ L qPCR reaction with 10  $\mu$ L of 2 $\times$  SYBR Premix Ex Taq (TaKaRa Bio Inc., Otsu, Japan) and 0.4  $\mu$ L of each primer (10  $\mu$ M) and run on a Mx3000P QPCR system (Agilent, Santa Clara, CA, USA). PCR conditions consisted of one cycle of 95°C for 2 min, then 40 cycles of 95°C for 30 sec, 55°C for 30 sec and 72°C for 30 sec. Finally a melting curve was included after each run. All primers used for qPCR were positioned in the 3' end of genes and amplified a DNA fragment of ~150-250 bps. Primers were designed using Primer3 (22) to prevent amplification of genomic DNA by letting at least one primer in each primer pair span an intron (Table S1-3). Transcript levels were normalized using three reference genes: Elongation factor 1- $\alpha$ , ubiquitin and glyceraldehyde 3-phosphate dehydrogenase and the efficiency of each qPCR reaction measured with a dilution series of templates at four different concentrations. For analysis, the mean Ct values of triplicate qPCR reactions were used. The relative gene expression levels between mycelium and gongylidia were determined using the software program REST (23), which uses a pairwise fixed reallocation test with 10,000 random reallocations to assess the significance of obtained values. Because the expression levels were measured as ratios they are non-normally distributed with more variability in the upper standard errors (23). Absolute quantification was achieved by measuring cDNA content in the template used to generate the dilution series standard curve with Quant-It<sup>tm</sup> PicoGreen<sup>®</sup> (Invitrogen, CA, USA, Carlsbad) following the manufacturers recommendations. The absolute number of transcripts was calculated using the formula:

$$\text{Number of transcripts} = \frac{\text{ng} * 6.022 * 10^{23}}{\text{length} * 10^9 * 650}$$

where  $6.022 * 10^{23}$  molecules / mol represents Avogadro's number, and assuming that the average weight of a basepair is 650 Dalton. The absolute number of transcripts was standardized to the total amount of RNA and not corrected using the reference genes, which increased variation between samples slightly (Fig. 3D).

#### *Recombinant expression of LgLcc1*

The laccase *LgLcc1* cDNA sequence was heterologously expressed in *Saccharomyces cerevisiae* yeast to determine whether the fungal laccase was functionally active and to confirm the polyphenol oxidative potential of the enzyme. The coding sequence of *LgLcc1* was amplified with the primers Cont0\_F\_yea\_BamHI and Cont0\_R\_EcoRI containing a BamHI and EcoRI restriction site tail, respectively, using cDNA as template (Table S1-3). PCR conditions were one

cycle of 94°C for 4 min, then 40 cycles of 94°C for 30 sec, 60°C for 30 sec and 72°C for 45 sec, followed by 20 cycles of 95°C for 30 sec, 55°C for 30 sec and 72°C for 1 min, and ending with one cycle of 72°C for 10 min. The amplified cDNA PCR product was inserted into the yeast expression vector *pYES2* (Invitrogen) under the control of a galactose inducible promoter. To ensure that no PCR errors had been incorporated into the construct the amplified cDNA was sequenced. The yeast strain INVSc1 (*S. cerevisiae*: MATa/ $\alpha$  *his3 $\Delta$ 1 leu2 trp1-289 ura3-52* (Invitrogen)) was transformed with either the *pYES2* vector containing the laccase gene (*pYES2 – LgLcc1*) or an empty *pYES2* vector (*pYES2-*) using the LiOAc/poly-ethylene glycol (PEG) method (22). Positive transformants (*Ura+*) were selected after incubation at 25°C for 3 days on uracil depleted yeast medium consisting of: 2% glucose, 2 % bacto-agar, 0.7 % (wt/vol) yeast nitrogen base (Invitrogen) and 0.2 % yeast synthetic drop-out media supplement without uracil (Sigma- Aldrich). Successfully transformed INVSc1 yeast colonies are able to synthesize uracil from the *ura3-52* gene located on the plasmid and six *Ura+* colonies were selected and transferred to an induction medium containing: 2% galactose, 2 % bacto-agar, 0.7 % (wt/vol) yeast nitrogen base, 0.2 % yeast synthetic drop-out media supplement without uracil, 0.5 mM CuSO<sub>4</sub> and 0.5 % Gallic acid (Sigma-Aldrich Denmark A/S, #241105). After incubation for five days at 25°C a dark colouration became visible in the transformed yeast colonies, which indicated a positive polyphenol oxidase reaction when gallic acid was present in the medium.

*Ura+* INVSc1 colonies were also grown in liquid induction medium consisting of: 2% galactose, 0.7 % (wt/vol) yeast nitrogen base, 0.2 % yeast synthetic drop-out media supplement without uracil, and 0.5 mM CuSO<sub>4</sub>- or in non-inducible selective medium by galactose substituted with glucose and later transferred to the induction medium. 5 ml yeast cultures were harvested by centrifugation and 300  $\mu$ l 0.1 M Citric acid – sodium citrate buffer (pH = 5.5) and glassbeads were added before cells were disrupted with a FastPrep® lysis machine as previously described. Extracts were centrifuged at 15.000g for 20 min at 4°C before the supernatants were mixed on ice with a set of protease inhibitors. Laccase activity was measured as previously described and general polyphenol oxidase activity was spectrophotometrically measured using 20mM Gallic acid in 0.1 M Citric acid – sodium citrate buffer (pH = 5.5) as substrate. However, because of unknown yeast inhibitors also previously reported for gal-induced heterologous expression of fungal laccase enzymes in yeast (25-27), this method produced distinctly positive but very low and variable amounts of laccase enzyme activity after extended incubation periods at varying temperatures.

#### *Positive selection analysis*

In order to estimate laccase *LgLcc1* sequence evolution the homologous enzymes were sequenced from closely related ant-cultivated fungi within Clade 1 (4). Fungus garden RNA was extracted from *Trachymyrmex cornetzi* (Tra.sp1.C#004\_270408) representing the higher-attines and *Cyphomyrmex longiscapus* (Cyp.lon.C#012\_180507) representing the lower-attines and cDNA constructed as described above. A 141bp region of the laccase gene, between the two

highly conserved copper binding regions I and II was amplified using the primers LccF1 and LccR1 (28) in combination with the specific degenerate primers LccF1-1 and LccR1-1 (Table S1-3) placed internal to the primers LccF1/R1. The full lengths of these partial laccase gene fragments were obtained with RACE-PCR (except for the final 5' end (ca. 300bp) of the laccase gene *CLcc1* of the *C. longiscapus* fungus garden which could not be amplified). BLASTx searches of the NCBI GenBank database were performed to confirm the sequence similarity and presence of the laccase consensus sequence signature of the cloned laccase gene fragments (16). Genbank accession numbers are JQ307232 and JQ307233.

Tests for significantly positive natural selection were performed with the branch model and branch-site model test and statistical significance was evaluated with likelihood-ratio tests of the estimated models using codeml as implemented in PAML 4.4 (29). Maximum likelihood estimates of the dN/dS ( $\omega$ ) ratio at sites along a protein indicate positive Darwinian selection if  $\omega > 1$  and thus allows for the detection of lineages and sites subject to divergent selection. Tests were performed on a small subtree with five laccase sequences: *LgLcc1*, *TcLcc1*, *CLcc1*, *Lac* from *Cyathus bulleri* (EU195884), and *Lac2* from *Coprinus comatus* (JQ228449) based on sequence similarity in a neighbour-joining analysis (Fig. S4). We believe that this number of taxa represents an optimal compromise between having sufficient outgroup comparison and avoiding position change saturation that would follow from including more distantly related sequences. The alignment was trimmed until the first conserved region by, respectively, 26 codons from the start and 9 codons from the end, to avoid artefacts resulting from misalignment in the variable end regions. The Branch-site test allows for varying dN/dS ratios ( $\omega$ ) both between particular branches and between particular amino-acid positions. A specific branch is selected *a priori* dividing the tree into background and foreground branches. The model then divides the sites at the background lineages into two classes: conserved sites with  $0 < \omega_0 < 1$  and neutral sites with  $\omega_1 = 1$ . The foreground lineages contain the same site classes, but with a proportion  $p = 1 - p_0 - p_1$  of sites in a third site class with  $\omega_2 > 1$ . The model parameters are estimated with maximum likelihood and compared with a log-likelihood ratio test to the null model where  $\omega_2 = 1$  across all sites in foreground lineages. Following a significant branch-site model test, a Bayes empirical Bayes analysis was used to estimate the specific codons with a significant probability of positive selection ( $\omega > 1$ ) as described in (30). Each model was run three times with varying initial values of  $\omega$  to avoid local maximum likelihood estimates. The validity of this analysis was verified by performing the same analysis using two other outgroups with only laccase sequences from the family Agaricaceae to which the attine fungi belong (Table S9). These additional analyses showed the same result, although the inclusion of more distantly placed (Fig. S4) and likely paralogous laccase sequences indicated positive selection also on the branch leading to *TcLcc1* cultivated by *T. cornetzi* (Table S9).

### *Protein model*

The structural properties of *LgLcc1* were analysed with homology modelling of the secondary protein structure using Swissmodels (31-33), Cphmodels (34), and 3D-Jigsaw (35, 36). The different models were evaluated with the Qmean score (37) and the final model evaluated with a Ramachandran plot using Procheck (38). The crystal structure of a laccase enzyme from the free-living basidiomycete *Trametes trogii* (NCBI-Structure: 2hrgA) was used as template for the homology model (Blast E-value = 7.66e-165, Sequence identity = 60.8%) based on iterated blast searches. The final model predicted the position of 486 amino acids (98% of the total AA sequence) and manual inspection of the Ramachandran plot for this model indicated normal molecule tension in the 3D structure (98.3% residues in core + allowed region). The molecular mass of 54 kDa and the isoelectric point of 4.7 were calculated using WinPep (39) and H++ respectively (40, 41). An isoelectric point of 4.7 is lower than the observed pI of 6.3 – 6.5 obtained by isoelectric focusing of the laccase from leaf-cutting fecal droplets in (42), a difference that likely reflects secondary enzyme modifications that were not accounted for in our protein model.

### **Additional analysis**

#### *Laccase enzyme activity of fungal cultivars grown in-vitro*

Laccase activity of isolated fungal cultures was studied with liquid cultures grown in standard potato dextrose media and thus grown with no specific induction of laccase activity. Fungal cultures were isolated by placing a small tuft of mycelium from fungus gardens on Potato Dextrose Agar media (Sigma-Aldrich Denmark A/S, #P2182) containing streptomycin and successful isolates were subcultured and maintained on PDA media. Liquid cultures were prepared by placing a small agar plug (0.5 cm<sup>3</sup>) from each fungus culture in 10 mL Potato Dextrose Broth medium (Sigma-Aldrich Denmark A/S, #P6685). All fungus cultures were grown without movement at 25 °C in the dark. Liquid cultures were harvested by washing the fungal cultures on filterpaper with cold ddH<sub>2</sub>O to remove growth media after ca. 30 days when the fungal cultures were still actively growing and there was excess media left. The washed cultures were placed on a pre-cooled ceramic tray with a recess (ca. 2 cm diam.) standing on a cooling element. 30 mg sea sand (Merck, 1.07712.1000, grain size 0.1-0.3) and 100 µl 0.1 M Citric acid – sodium citrate buffer (pH = 5.5) was added before cultures were homogenized using the bottom of a glass tube, which together with the sand particles grinded the fungus cultures into a homogenous solution that was transferred to an eppendorf tube. 1000 µl 0.1 M Citric acid – sodium citrate buffer (pH = 5.5) was added and the solution vortexed.

The homogenized fungal cultures were standardized to ensure that possible differences in enzyme activity were not due to differences in biomass. 100 µl of homogenized culture were measured in triplicate by spectrophotometry and the optical density at 650nm was used as a measure of fungal biomass in the sample. The leftover culture solution was subsequently aliquoted as 150 µl samples in 5 separate eppendorf tubes and diluted with 0.1 M Citric acid –

sodium citrate buffer (pH = 5.5) so all culture solutions had the same optical density (OD = 0.8). Enzymes were then extracted by centrifugation at 15.000g for 15 min at 4 °C, and the laccase activity measured as previously described. Due to some mortality of colonies over the course of this research and contamination of some fungal cultures not the exact same fungal isolates were available for these experiments as in the assays measuring laccase activity of intact fungus gardens. Laccase activity in liquid cultures did not differ significantly between species ( $F_{13,39} = 2.02$ ,  $p = 0.0620$ ) but showed the same trend of higher laccase activity in fungal cultures from leaf-cutting ants except for isolated cultivars of *A. cephalotes* (Fig S1).

## References

1. Schultz TR, Brady SG (2008) Major evolutionary transitions in ant agriculture. *Proc Natl Acad Sci USA* 105: 5435-5440.
2. Villesen P, Murakami T, Schultz TR, Boomsma JJ (2002) Identifying the transition between single and multiple mating of queens in fungus-growing ants. *Proc. R. Soc. Lond. B* 269: 1541-1548.
3. Hughes WHO, Pagliarini R, Madsen HB, Dijkstra MB, Boomsma JJ (2008) Antimicrobial defense shows an abrupt evolutionary transition in the fungus-growing ants. *Evolution* 62: 1252-1257.
4. Mikheyev AS, Mueller UG, Abbot P (2010) Comparative dating of attine ant and Lepiotaceous cultivar phylogenies reveals coevolutionary synchrony and discord. *Am Nat* 175:E126-133.
5. De Fine Licht HH, Schiøtt M, Mueller UG, Boomsma JJ (2010) Evolutionary transitions in enzyme activity of ant fungus gardens. *Evolution* 64:2055-2069.
6. Moller IE, De Fine Licht HH, Harholt J, Willats WGT, Boomsma JJ (2011) The dynamics of plant cell-wall polysaccharide decomposition in leaf-cutting ant fungus gardens. *PLoS ONE*, 6: doi:10.1371/journal.pone.0017506.
7. Schiøtt M, Rogowska-Wrzęsinska A, Roepstorff P, Boomsma JJ (2010) Leaf-cutting ant fungi produce cell wall degrading pectinase complexes reminiscent of phytopathogenic fungi. *BMC Biol* 8: doi:10.1186/1741-7007-8-156.
8. Leonowicz A, Grzywnowicz K (1981) Quantitative estimation of laccase forms in some white-rot fungi using syringaldazine as a substrate. *Enzyme Microb Tech* 3:55-58.
9. Harkin JM, Obst JR (1973) Syringaldazine, an effective reagent for detecting laccase and peroxidase in fungi. *Experientia* 29:381-508.
10. Abouheif E (1999) A method for testing the assumption of phylogenetic independence in comparative data. *Evol Ecol Res* 1:895-909.
11. Midford PE, Garland T, Maddison WP (2005) PDAP package of Mesquite. Version 1.07.
12. Maddison WP, Maddison DR (2006) Mesquite: A modular system for evolutionary analysis. Version 1.1, <http://mesquiteproject.org>.
13. Pagel M (1999) Inferring the historical patterns of biological evolution. *Nature* 401:877-884.
14. Shevchenko A *et al.* (1996) Linking genome and proteome by mass spectrometry: large-scale identification of yeast proteins from two dimensional gels. *Proc Natl Acad Sci USA* 93:14440-14445.
15. Roepstorff P, Fohlman J (1984) Proposal for a common nomenclature for sequence ions in mass-spectra of peptides. *Biomed Mass Spectrom* 11:601.
16. Kumar SVS, Phale PS, Durani S, Wangikar PP (2003) Combined sequence and structure analysis of the fungal laccase family. *Biotechnol Bioeng* 83:386-394.
17. Huang X (1992) A contig assembly program based on sensitive detection of fragment overlaps. *Genomics* 14:18-25.
18. Stanke M, Morgenstern B (2005) AUGUSTUS: a web server for gene prediction in eukaryotes that allows user-defined constraints. *Nucleic Acids Res* 33:W465-467.
19. Nielsen H, Engelbrecht J, Brunak S, von Heijne G (1997) Identification of prokaryotic and eukaryotic signal peptides and prediction of their cleavage sites. *Protein Eng* 10:1-6.
20. Emanuelsson O, Brunak S, von Heijne G, Nielsen H (2007) Locating proteins in the cell using TargetP, SignalP and related tools. *Nature Protoc* 2:953-971.
21. Emanuelsson O, Nielsen H, Brunak S, von Heijne G (2000) Predicting subcellular localization of proteins based on their N-terminal amino acid sequence. *J Mol Biol* 300:1005-1016.



22. Rozen S, Skaletsky H (2000) in *Bioinformatics Methods and Protocols: Methods in Molecular Biology*, eds Misener S, Krawetz SA (Humana Press, Totowa, NJ), pp. 365-386.
23. Pfaffl M, Horgan G, Dempfle L (2002) Relative expression software tool (REST©) for group-wise comparison and statistical analysis of relative expression results in real-time PCR. *Nucleic Acids Res* 30:1-10.
24. Schiestl R, Gietz R (1989) High efficiency transformation of intact yeast cells using single stranded nucleic acids as carrier. *Curr Genet* 16:339-346.
25. Cassland P, Jonsson LJ (1999) Characterization of a gene encoding *Trametes versicolor* laccase A and improved heterologous expression in by decreased cultivation temperature. *Appl Microbiol Biot* 52:393-400.
26. Kiiskinen LL, Saloheimo M (2004) Molecular cloning and expression in *Saccharomyces cerevisiae* of a laccase gene from the ascomycete *Melanocarpus albomyces*. *Appl Environ Microb* 70:137-144.
27. Kim JM, Park SM, Kim DH (2010) Heterologous expression of a tannic acid-inducible laccase 3 of *Cryphonectria parasitica* in *Saccharomyces cerevisiae*. *BMC Biotech* 10, doi:10.1186/1472-6750-10-18.
28. D'Souza TM, Boominathan K, Reddy CA (1996) Isolation of laccase gene-specific sequences from white rot and brown rot fungi by PCR. *Appl Environ Microb* 62:3739-3744.
29. Yang ZH (2007) PAML 4: Phylogenetic analysis by maximum likelihood. *Mol Biol Evol* 24:1586-1591.
30. Yang ZH, Wong WSW, Nielsen R (2005) Bayes empirical Bayes inference of amino acid sites under positive selection. *Mol Biol Evol* 22:1107-1118.
31. Schwede T, Kopp J, Guex N, Peitsch MC (2003) SWISS-MODEL: an automated protein homology-modeling server. *Nucleic Acids Res* 31:3381-3385.
32. Arnold K, Bordoli L, Kopp J, Schwede T (2006) The SWISS-MODEL workspace: a web-based environment for protein structure homology modelling. *Bioinformatics* 22:195-201.
33. Bordoli L *et al.* (2009) Protein structure homology modeling using SWISS-MODEL workspace. *Nature Protoc* 4:1-13.
34. Nielsen M, Lundegaard C, Lund O, Petersen TN (2008) paper presented at the CASP8 conference at Sardinia, Italy.
35. Bates PA, Sternberg MJE (1999) Model building by comparison at CASP3: Using expert knowledge and computer automation. *Proteins* 37:47-54.
36. Bates PA, Kelley LA, MacCallum RM, Sternberg MJE (2001) Enhancement of protein modeling by human intervention in applying the automatic programs 3D-JIGSAW and 3D-PSSM. *Proteins* 45:39-46.
37. Benkert P, Tosatto SCE, Schomburg D (2008) QMEAN: A comprehensive scoring function for model quality assessment. *Proteins* 71:261-277.
38. Laskowski RA, MacArthur MW, Moss DS, Thornton JM (1993) Procheck - a program to check the stereochemical quality of protein structures. *J Appl Crystallogr* 26:283-291.
39. Hennig L (1999) WinGene/WinPep: User-friendly software for the analysis of amino acid sequences. *Biotechniques* 26:1170-1172.
40. Gordon JC *et al.* (2005) H<sup>++</sup>: a server for estimating pK<sub>a</sub>s and adding missing hydrogens to macromolecules. *Nucleic Acids Res* 33:W368-371.
41. Anandkrishnan R, Onufriev A (2008) Analysis of basic clustering algorithms for numerical estimation of statistical averages in biomolecules. *J Comput Biol* 15:165-184.
42. Ronhede S, Boomsma JJ, Rosendahl S (2004) Fungal enzymes transferred by leaf-cutting ants in their fungus gardens. *Mycol Res* 108:101-106.
43. Courty PE *et al.* (2009) Phylogenetic analysis, genomic organization, and expression analysis of multi-copper oxidases in the ectomycorrhizal basidiomycete *Laccaria bicolor*. *New Phytol* 182:736-750.
44. Larrondo LF, Salas L, Melo F, Vicuna R, Cullen D (2003) A novel extracellular multicopper oxidase from *Phanerochaete chrysosporium* with ferroxidase activity. *Appl Environ Microb* 69:6257-6263.

## Tables

**Table S1.** Primers used in this study for the *Acromyrmex echinator* cultivar: *Leucocoprinus gongylophorus*.

| Gene                     | Primer function                | name                     | Strand     | Sequence (5' - 3'), (X = Inosin)    | Ref.                 |
|--------------------------|--------------------------------|--------------------------|------------|-------------------------------------|----------------------|
| Fungal laccases          | Fungal laccase primer          | LccF1                    | F          | CAYTGGCAYGGNTTYTTYCA                | (52)                 |
|                          | Attine cultivar laccase primer | LccF1-1                  | F          | AGTTCCGTCKGCCCAASY                  | This study           |
|                          | Fungal laccase primer          | LccR1                    | R          | RTGRCTRTGRTACCARAANGT               | (52)                 |
|                          | Attine cultivar laccase primer | LccR1-1                  | R          | CAGAAGGTACCRGCTTGG                  | This study           |
| <i>LgLcc1</i>            | Protein seq. deg. primer       | Sp1-F1                   | F          | GCTGTCMTXCARGTNGARCA                | This study           |
|                          | Protein seq. deg. primer       | LccF2                    | F          | ACNTTYTGGTAYCAYAGYCA                | This study           |
|                          | qPCR                           | LccF3                    | F          | CCTACAACACTACGACAATCC               | This study           |
|                          | Protein seq. deg. primer       | LccF4                    | F          | GTNCARYTNTTYACXGGXCA                | This study           |
|                          | Expression cloning             | Cont0_F_yea_BamHI        | F          | GGATCCACACAATGAAGACGGCTT<br>TAGGTCT | This study           |
|                          | Protein seq. deg. primer       | Sp3-R1                   | R          | TGACCRGCRAAXAKYTNAC                 | This study           |
|                          | Protein seq. deg. primer       | LccR2                    | R          | AGDATYTG NAGNAGNACXGG               | This study           |
|                          | Protein seq. deg. primer       | LccR3                    | R          | TGNCCRTGNAGRTGRAAXGG                | This study           |
|                          | Protein seq. deg. primer       | LccR4                    | R          | TGNCCNGTRAAXARYTGXAC                | This study           |
|                          | Protein seq. deg. primer       | LccR5                    | R          | TTNARRTRTRC RTAXGTXGT               | This study           |
|                          | Protein seq. deg. primer       | LccR6                    | R          | ACATTGACCACCCCTATATCAG              | This study           |
|                          | qPCR                           | LccR7                    | R          | CATAAGTCACTCCAAGCATCG               | This study           |
|                          | Expression cloning             | Cont0_R_EcoRI            | R          | GAATTCTCAGGTTCCCGAATCTTG<br>ATCT    | This study           |
|                          | <i>LgLcc2</i>                  | RACE and gene sequencing | Cont1_for1 | F                                   | CCAACCAAGCCATATACTGT |
| RACE and gene sequencing |                                | Cont1_for2               | F          | GGACCGGTAATTACAATGAG                | This study           |
| RACE and gene sequencing |                                | Cont1_for3               | F          | ATTTCGAAGTCAATGGTCAC                | This study           |
| qPCR                     |                                | Cont1_for4               | F          | TCGTCAGAGACACTGTCAAC                | This study           |
| RACE and gene sequencing |                                | Cont1_for5               | F          | ATGCAC TTTCTTTCTTATCTACTC           | This study           |
| RACE and gene sequencing |                                | Cont1_3race1             | F          | CCTGGACCGTGGATCTTGACAC              | This study           |
| RACE and gene sequencing |                                | Cont1_rev1               | R          | ACAAAGATCGGTCCAAGAA                 | This study           |
| RACE and gene sequencing |                                | Cont1_rev2               | R          | CGTTGACTGGAGTAGATTCG                | This study           |
| RACE and gene sequencing |                                | Cont1_rev3               | R          | GCGTAGATTTGAATCGTGTT                | This study           |
| qPCR                     |                                | Cont1_rev4               | R          | TCAATGTGACAGTGCAAGAT                | This study           |
| RACE and gene sequencing |                                | Cont1_rev5               | R          | CTGACCGGCGTAGATTTG                  | This study           |
| <i>LgLcc3</i>            | RACE and gene sequencing       | Cont2_for1               | F          | CCCTTGCTTACACCATTG                  | This study           |
|                          | RACE and gene sequencing       | Cont2_for2               | F          | TGATCCCAACTTCGTATTCT                | This study           |
|                          | RACE and gene sequencing       | Cont2_for3               | F          | AACTCAATCTTCCCTCTGGT                | This study           |
|                          | RACE and gene sequencing       | Cont2_for4               | F          | AGATACCGTTGGCGATTTTG                | This study           |
|                          | qPCR                           | Cont2_for5               | F          | ATTGCCATATTGATTCCAC                 | This study           |
|                          | RACE and gene sequencing       | Cont2_for6               | F          | ATGTTACCTAATCTTCAATTTGC             | This study           |
|                          | RACE and gene sequencing       | Cont2_3race1             | F          | CTTGCTGAAGCCCCGGAAGATA              | This study           |

|               |                          |              |   |                              |            |
|---------------|--------------------------|--------------|---|------------------------------|------------|
|               | qPCR                     | Cont2_rev1   | R | CCAAGTCTGACAAAGCTGAT         | This study |
|               | RACE and gene sequencing | Cont2_rev2   | R | GATATTTGAATCAGGGGTCA         | This study |
|               | RACE and gene sequencing | Cont2_rev3   | R | GTTCAATGATGGTGAGGTC          | This study |
|               | RACE and gene sequencing | Cont2_rev4   | R | ACTCAGCAGGTGGGGTCTTA         | This study |
|               | RACE and gene sequencing | Cont2_rev5   | R | AGTAACGCTGACCTGCTAAG         | This study |
| <i>LgLcc4</i> | RACE and gene sequencing | Cont3_for1   | F | GCTCACTGTAGAAAAGACAAA        | This study |
|               | RACE and gene sequencing | Cont3_for2   | F | TGGAGACTCATTCCCTACAA         | This study |
|               | RACE and gene sequencing | Cont3_for3   | F | CCTGAGGAGTGCTCACTGTA         | This study |
|               | qPCR                     | Cont3_for4   | F | CTTGATGTTGGCTTTGCTAT         | This study |
|               | RACE and gene sequencing | Cont3_for5   | F | CAATATCACACCAACTTTATGG       | This study |
|               | RACE and gene sequencing | Cont3_for6   | F | GGTATCAATCAGTGCCCTATC        | This study |
|               | RACE and gene sequencing | Cont3_for7   | F | ATGGCCCGAAGCTCATATT          | This study |
|               | RACE and gene sequencing | Cont3_for8   | F | GTTCGACTCAAAGAAGATGG         | This study |
|               | RACE and gene sequencing | Cont3_for9   | F | CCCGAAGCTCATATTTTGT          | This study |
|               | RACE and gene sequencing | Cont3_3race1 | F | TTCGCAGAGGCACCAGAACAAAC      | This study |
|               | qPCR                     | Cont3_rev1   | R | GTTGCGTTAGGATGAGTTTC         | This study |
|               | RACE and gene sequencing | Cont3_rev2   | R | TGAAGATGGAATGGGTGAG          | This study |
|               | RACE and gene sequencing | Cont3_rev3   | R | ATAGCTCTTCCCATTGCTTT         | This study |
|               | RACE and gene sequencing | Cont3_rev4   | R | ACTCCTCAGGGGACAGTAG          | This study |
|               | RACE and gene sequencing | Cont3_rev5   | R | AAATTATGCCCGTGAAGAT          | This study |
|               | RACE and gene sequencing | Cont3_rev6   | R | ATATTGCACCCCGAAATG           | This study |
| <i>LgLcc5</i> | RACE and gene sequencing | Cont4_for1   | F | CGACATTAACGGTATTTCTT         | This study |
|               | RACE and gene sequencing | Cont4_for2   | F | GTGCTTCTTGCTGGTCTTT          | This study |
|               | RACE and gene sequencing | Cont4_for3   | F | GCGACGTGTATCCTATCAAT         | This study |
|               | qPCR                     | Cont4_for4   | F | CAATTCAAGAATCCTCTACG         | This study |
|               | RACE and gene sequencing | Cont4_for5   | F | ATTCATCTCAGCGCTTGC           | This study |
|               | RACE and gene sequencing | Cont4_3race1 | F | GATTGGCACCTGGAAGCTGGTCT      | This study |
|               | RACE and gene sequencing | Cont4_rev1   | R | AGTGGGTGAAATGTAGGAAA         | This study |
|               | qPCR                     | Cont4_rev2   | R | GCAGAGATCTTCCAATCCT          | This study |
|               | RACE and gene sequencing | Cont4_rev3   | R | TGCCAATCAATATGACAGTG         | This study |
|               | RACE and gene sequencing | Cont4_5race1 | R | AAAAAGCGAGTCGCAGCGAAGAC      | This study |
|               | RACE and gene sequencing | Cont4_5race2 | R | CGCTGAAAAGACCAGCAAGAAGC      | This study |
| <i>LgLcc6</i> | RACE and gene sequencing | Cont5_for1   | F | ACATTCCAGCACCTACAATC         | This study |
|               | RACE and gene sequencing | Cont5_for2   | F | TTCAATGTTGTCAGAAGTGC         | This study |
|               | RACE and gene sequencing | Cont5_for3   | F | ACAATAGCGAACAAGGACAT         | This study |
|               | RACE and gene sequencing | Cont5_for4   | F | CCCCATCCTTTCCACTTACA         | This study |
|               | qPCR                     | Cont5_for5   | F | TCCCTGGATCTTACATTGTC         | This study |
|               | RACE and gene sequencing | Cont5_for6   | F | AGATGCTGCTCGTCACTC           | This study |
|               | RACE and gene sequencing | Cont5_3race1 | F | GTGCCCTACCTGGAATGCGTTTT      | This study |
|               | RACE and gene sequencing | Cont5_rev1   | R | GTAGGGCACAGTTGATTGTAA        | This study |
|               | RACE and gene sequencing | Cont5_rev2   | R | CTGAACGTTGACAACCTGCTA        | This study |
|               | qPCR                     | Cont5_rev3   | R | TTGTAATTGTCTGAGAGAGGAGG<br>A | This study |

|                  |                          |              |   |                                 |            |
|------------------|--------------------------|--------------|---|---------------------------------|------------|
|                  | RACE and gene sequencing | Cont5_5race1 | R | TCGAGAAAACCCGTCAGGGGATA         | This study |
|                  | RACE and gene sequencing | Cont5_5race2 | R | GCAACGACAACAGCAGCCAAAGT         | This study |
| <i>LgLcc7</i>    | RACE and gene sequencing | Cont8_for1   | F | ATCTTCACGGGCATACGTT             | This study |
|                  | RACE and gene sequencing | Cont8_for2   | F | AGTCAATTCAGCCAACAACACT          | This study |
|                  | RACE and gene sequencing | Cont8_for3   | F | CACTGTAGGCCCTGTATCT             | This study |
|                  | qPCR                     | Cont8_for4   | F | GGATTCTCCACTGTCACATTA           | This study |
|                  | RACE and gene sequencing | Cont8_3race1 | F | GATCTTGGCTTTGCGGTTGTGTTTC       | This study |
|                  | RACE and gene sequencing | Cont8_for5a  | F | ATGCGCCTAGCTGATGCT              | This study |
|                  | RACE and gene sequencing | Cont8_for5b  | F | ATGCTGGTTTGTCAAGCA              | This study |
|                  | qPCR                     | Cont8_rev1   | R | GAGTTCGGATGTGTTGTTTT            | This study |
|                  | RACE and gene sequencing | Cont8_rev2   | R | CAGAGCTGATCCCAATTTTT            | This study |
|                  | RACE and gene sequencing | Cont8_rev3   | R | AGTTGTGGCTGAATTGACT             | This study |
|                  | RACE and gene sequencing | Cont8_rev4   | R | TTAAGTTGTTCCGCCCTTCT            | This study |
|                  | RACE and gene sequencing | Cont8_5race1 | R | TGGTTACCCTTATTTGACCTGGGT<br>CTG | This study |
|                  | RACE and gene sequencing | Cont8_5race2 | R | CGCCCTTCTTTGCCAGATAACA          | This study |
| <i>LgLcc8</i>    | RACE and gene sequencing | Cont10_for1  | F | ACCACTCCTATGACTTCTGG            | This study |
|                  | RACE and gene sequencing | Cont10_for2  | F | GAAATACCTTGCTTTCCTTG            | This study |
|                  | qPCR                     | Cont10_for3  | F | AGCACTGGACCTTTCATGT             | This study |
|                  | RACE and gene sequencing | Cont10_for_4 | F | TATGAAATACCTTGCTTTCCTT          | This study |
|                  | RACE and gene sequencing | Cont10_3race | F | GTTGACCCTCAAGGCACTCGTGA         | This study |
|                  | RACE and gene sequencing | Cont10_rev1  | R | GCAGGAAGAGCATCGTAA              | This study |
|                  | qPCR                     | Cont10_rev2  | R | ATCGTAAGCTGGGCAAAGAG            | This study |
|                  | RACE and gene sequencing | Cont10_rev3  | R | GCCAGAAGTCATAGGAGTGG            | This study |
|                  | RACE and gene sequencing | Cont10_rev4  | R | CGAGAAAGAGTAGCATTTTTGA          | This study |
| <i>LgLcc9</i>    | RACE and gene sequencing | Cont6_for1   | F | TCCTGCTATTCTCTCTGCTC            | This study |
|                  | RACE and gene sequencing | Cont6_for2   | F | GTACCGACGTCGAAGAGTC             | This study |
|                  | RACE and gene sequencing | Cont6_for3   | F | CTGCCTCCATGTTCTCTCT             | This study |
|                  | qPCR                     | Cont6_for4   | F | AGCTCAAGGACAACCTGTGAA           | This study |
|                  | RACE and gene sequencing | Cont6_3race1 | F | GAAGCGCTTGAATGCCTGT TTC         | This study |
|                  | qPCR                     | Cont6_rev1   | R | AAAACACATCCAAACATTGC            | This study |
|                  | RACE and gene sequencing | Cont6_rev2   | R | AGTCCATAGAACCGACCTCT            | This study |
|                  | RACE and gene sequencing | Cont6_rev3   | R | TTTCCAGCATCAGAGTTCTT            | This study |
|                  | RACE and gene sequencing | Cont6_rev4   | R | GGTACCGTCGACTTCAATAA            | This study |
|                  | RACE and gene sequencing | Cont6_5race1 | R | TGACACGACGCTCAAAGAGACCA         | This study |
|                  | RACE and gene sequencing | Cont6_5race2 | R | GGTCAGGTCCCACCAGAGTTTCGT        | This study |
| <i>Ubiquitin</i> | qPCR                     |              | F | AACGATAATGGGACCCGGTG            | (13)       |
|                  | qPCR                     |              | R | GATTGGGATCAGTCAGCATTG           | (13)       |
| <i>GADPH</i>     | qPCR                     |              | F | TCAACGCAAGCTCACTGGT             | (13)       |
|                  | qPCR                     |              | R | ACAAAATCCCGTTCAAAGGAAT<br>C     | (13)       |
| <i>Efla</i>      | qPCR                     |              | F | TTGGAGGAATCTCCCAACATG           | (13)       |
|                  | qPCR                     |              | R | AACGGACTTGACTTCAGTAGTC          | (13)       |

**Table S2.** Primers used in this study for the *Trachymyrmex cornetzi* cultivar: *Leucocoprinus* sp.

| Gene                    | Primer function          | name             | Strand        | Sequence (5' - 3')       | Reference             |
|-------------------------|--------------------------|------------------|---------------|--------------------------|-----------------------|
| <i>TcLcc1</i>           | RACE and gene sequencing | Tsp1-3_Lcc_F2    | F             | CCGGCACCTTCTGGTATCATTC   | This study            |
|                         | RACE and gene sequencing | Tsp1-3_Lcc_F3    | F             | TCATTCCCATCGTTCTACGCAGT  | This study            |
|                         | RACE and gene sequencing | Tsp1-3_Lcc_F4    | F             | CCTGCGCGGTGCATTAGTTATT   | This study            |
|                         | RACE and gene sequencing | Tsp1-3_Lcc_F5    | F             | ACGATGAGGACGGCTTTGAGTC   | This study            |
|                         | RACE and gene sequencing | Tsp1-3_Lcc_F6    | F             | ATGGGCACGCTTTCGATGTAAT   | This study            |
|                         | RACE and gene sequencing | Tsp1-3_Lcc_F7    | F             | TGTAATCCGGAGTGCGGGTAGT   | This study            |
|                         | qPCR                     | Tsp1-3_Lcc_F8    | F             | CATATAACTACGTCAATCC      | This study            |
|                         | RACE and gene sequencing | Tsp1-3_Lcc_F9    | F             | CGCAGGGACACTGTATCGT      | This study            |
|                         | RACE and gene sequencing | Tsp1-3_Lcc_F10   | F             | GTATCGTTGGGAGAGACAGG     | This study            |
|                         | RACE and gene sequencing | Tsp1-3_Lcc_F11   | F             | GTTGGGAGAGACAGGGGATA     | This study            |
|                         | RACE and gene sequencing | Tsp1-3_Lcc_F12   | F             | ACGAATTTACTCGCCGAGACCA   | This study            |
|                         | RACE and gene sequencing | Tsp1-3_Lcc_R2    | R             | CGCAGGCCATCACAACTACTGC   | This study            |
|                         | RACE and gene sequencing | Tsp1-3_Lcc_R3    | R             | TATCCCCTGTCTCTCCCAACGA   | This study            |
|                         | RACE and gene sequencing | Tsp1-3_Lcc_R4    | R             | TGGTCTCGGCGAGTAAATTCGT   | This study            |
|                         | qPCR                     | Tsp1-3_Lcc_R5    | R             | CATAGATCACTCCAGGAATCA    | This study            |
|                         | RACE and gene sequencing | Tsp1-3_Lcc_R6    | R             | TCTTGGTCGGCGTATGTTGAA    | This study            |
|                         | RACE and gene sequencing | Tsp1-3_Lcc_R7    | R             | CCGCTATCTTGGTCGGCGTA     | This study            |
|                         | RACE and gene sequencing | Tsp1-3_Lcc_R8    | R             | TCACTCCAGGAATCAGTGACA    | This study            |
|                         | RACE and gene sequencing | Tsp1-3_Lcc_R9    | R             | CCAGGAATCAGTGACAGCTAA    | This study            |
|                         | qPCR                     | Tsp1_510_LccF8   | F             | CCTATAACTACGACAACCC      | This study            |
|                         | qPCR                     | Tsp1_510_LccR5   | R             | CATAGGTCACTCCAGGAATCG    | This study            |
|                         | <i>Efla</i>              | qPCR (Tsp1-4)    | EF1a-F1-Tsp1A | F                        | TTGGAGGAGTCTGAAAACATG |
| qPCR (Tsp1-5 & Tsp1-10) |                          | EF1a-F1-Tsp1B    | F             | TTGGAAGAGTCTGAGAATATG    | This study            |
| qPCR (Tsp1-4)           |                          | EF1a-R1-Tsp1B    | R             | CCGATACCACCAATTTTGTA     | This study            |
| qPCR (Tsp1-5 & Tsp1-10) |                          | EF1a-R1-Tsp1A    | R             | CCGATACCACCGATCTTGTA     | This study            |
| <i>Ubc</i>              | qPCR (Tsp1-4)            | Tsp14_Ubc_F4     | F             | AACGATAATGGGACCTGGTG     | This study            |
|                         | qPCR (Tsp1-5 & Tsp1-10)  | Tsp1510_Ubc_F4   | F             | GACGATAATGGGACCTGGTG     | This study            |
|                         | qPCR                     | Tsp1_Ubc_R4      | R             | GGTTGGGATCGGTCAGCATTG    | This study            |
| <i>GADPH</i>            | qPCR                     | Tsp1_GADPH_F4    | F             | TCAACGGCAAGCTCACTGGC     | This study            |
|                         | qPCR (Tsp1-4)            | Tsp14_GADPH_R4   | R             | ACAAAATTCCCATTACGCATATC  | This study            |
|                         | qPCR (Tsp1-5 & Tsp1-10)  | Tsp1510_GADPH_R4 | R             | ACAAAATTCCCATTCAACATAATC | This study            |

**Table S3.** Primers used in this study for the *Cyphomyrmex longiscapus* clade 1 cultivar *Leucocoprinus* sp.

| Gene         | Primer function          | name          | Strand | Sequence (5' - 3')         | Reference  |
|--------------|--------------------------|---------------|--------|----------------------------|------------|
| <i>CLcc1</i> | RACE and gene sequencing | Clon12_Lcc_F1 | F      | ACCGTTGGAGTTACGCAATG       | This study |
|              | RACE and gene sequencing | Clon12_Lcc_F2 | F      | ATGCCCAATATCTCCTGGAA       | This study |
|              | RACE and gene sequencing | Clon12_Lcc_F3 | F      | GAGCGTTTACTCTTCCTCGTA      | This study |
|              | RACE and gene sequencing | Clon12_Lcc_F4 | F      | CAGCACTTACAACACTACGTCAATCC | This study |
|              | RACE and gene sequencing | Clon12_Lcc_R1 | R      | TCGCCTCGAACTGATAAAGG       | This study |
|              | RACE and gene sequencing | Clon12_Lcc_R2 | R      | CCAGGAGATATTGGGCATTG       | This study |
|              | RACE and gene sequencing | Clon12_Lcc_R3 | R      | CAACGGTTCCATCGGCCCAAC      | This study |
|              | RACE and gene sequencing | Clon12_Lcc_R4 | R      | GGCCAGTCGCCTCGAACTGATAAAG  | This study |
|              | RACE and gene sequencing | Clon12_Lcc_R5 | R      | CGCAGGCCATCACAGTATTGCGTAG  | This study |

**Table S4 (Next page).** Alignment of laccase consensus sequences of *L. gongylophorus* with example fungal laccase sequences for comparison presented as in (43). **A.** Laccase sequences and **B.** multi-copper oxidase sequences with ferroxidase activity. Laccase and ferroxidase consensus sequences are from Kumar et al. (16) and Larrondo et al. (44), respectively.

**Table S4**

| <b>A</b>                 |                 | <b>Gene</b> | <b>Acc. Code</b>             | <b>L1</b>                | <b>L2</b> | <b>L3</b>               | <b>L4</b> |
|--------------------------|-----------------|-------------|------------------------------|--------------------------|-----------|-------------------------|-----------|
| <i>L. gongy/ophorus</i>  | LgLcc1          | JQ307223    | HWHGMFQNGTA-WADGTSVGTQCPI    | GTFWYHSHRSTQYCDGLRGAL    | HPFHLHGH  | GPWILLHCHIDWHLNDVGLAVVM |           |
| <i>L. gongy/ophorus</i>  | LgLcc2          | JQ307224    | HWHGIFQHRSTS-FMDGTEGVTQCPI   | GTFWYHSHFGEQYCDGIRGGL    | HPFHLHGH  | GPWILLHCHIDFHLKEGLAIVF  |           |
| <i>L. gongy/ophorus</i>  | LgLcc3          | JQ307225    | HWHGMFQRTN-FMDGTDGVTQCPI     | GTYWYHSHFVGQYCDGVRGFF    | HPFHLHGH  | GPWILLHCHIDFHLVTGLAIVF  |           |
| <i>L. gongy/ophorus</i>  | LgLcc4          | JQ307226    | HWHGILQYHTN-FMDGAAGINQCPI    | GTYWYHSHFVGQYCDGVRGAL    | HPFHLHGH  | GPWILLHCHIDFHLDVGF AIVF |           |
| <i>L. gongy/ophorus</i>  | LgLcc6          | JQ307228    | HWHGILQKGTN-FMDGTAGVTQCPI    | GTYWYHSHLGNQYCDGLRGAL    | HPFHLHGH  | GPWILLHCHIDFHLVNGLALVI  |           |
| <i>L. gongy/ophorus</i>  | LgLcc7          | JQ307229    | HWHGILQKGTN-FMDGTAGVTQCPI    | GTYWYHSHLGNQYCDGVRGAL    | HPMHLHGH  | GPWILLHCHINPHLDLGF AIVF |           |
| <i>L. gongy/ophorus</i>  | LgLcc5          | JQ307227    | HWHGLFQARTS-DMDGPAFVNQCPI    | GNFWYHSHLSTQYCDGLRGAL    | HPFHLHGH  | GAWFLHCHIDWHLEAGLAVVF   |           |
| <i>L. gongy/ophorus</i>  | LgLcc8          | JQ307230    | NLDGIFFNNSNIFEEAEPFNACPI     | GSEFWYHSELVQYVDGFRGFL    | HPFHLHGM  | GPFMFCHIFWHKFAGLASVQ    |           |
| <i>L. bicolor</i>        | Lcc1            | FJ432084    | HWHDMFQHGSS-WADGVPVGTQCPI    | GTFWYHSHHSTQYCDGLRGAL    | HPILHLHGT | GPWILLHCHIDWHLNLGLAVVF  |           |
| <i>C. cinerea</i>        | Lcc1            | AY338756    | HWHGLFQRTN-WADGADGVNQCPI     | GTFWYHSHFQYCDGLRGPM      | HPFHLHGH  | GPWFFFCHIEFHLMNGLAIVF   |           |
| <i>Cy.bulleri</i>        | laccase         | ABW75771    | HWHGLFQHGTT-WADGVPVGNQCPI    | GTFWYHSHHSTQYCDGLRGPL    | HPFHLHGH  | GPWILLHCHIDWHLELGLAIVF  |           |
| <i>P.nameko</i>          | laccase         | ABR24264    | HWHGFFQKGTN-WADGPAFVNQCPI    | GTFWYHSHHSTQYCDGLRGAM    | HPILHLHGH | GPWIMHCHIDWHFEIGLSVVF   |           |
| <i>L.edodes</i>          | laccase1        | BAB83131    | HWHGLFQKTTN-WADGPAFVNQCPI    | GTFWYHSHLSTQYCDGLRGPL    | HPFHLHGH  | GPWFLHCHIDWHLEAGFAIVF   |           |
| <i>T. versicolor</i>     | laccase         | 1KYA        | HWHGFFQKGTN-WADGPAFVNQCPI    | GTFWYHSHLSTQYCDGLRGFF    | HPFHLHGH  | GPWFLHCHIDFHL EAGFAVVF  |           |
| <i>M.albomyces</i>       | laccase         | 1GW0        | HWHGIIHQKDTN-LHDGANGVTECPI   | GTSWYHSHFSAQYGNVGVGTI    | HPMHLHGH  | GAWLFFCHIAWHVSGGLSVDF   |           |
| <b>Laccase consensus</b> |                 |             |                              |                          |           |                         |           |
|                          |                 |             | HWHxxxxxxxxxx-xxDGxxxxxxQCPI | GTXWYHSHHxxxxQYCDGLxGxXF | HPxHLHGH  | GPWxLHCHIDxHxxxxGLxxxxL |           |
|                          |                 |             |                              | L                        |           | A F A F F               |           |
|                          |                 |             |                              | I                        |           | V E E M M               |           |
|                          |                 |             |                              | M                        |           |                         |           |
| <b>B</b>                 |                 | <b>Gene</b> | <b>Genbank</b>               | <b>L1</b>                | <b>L2</b> | <b>L3</b>               | <b>L4</b> |
| <i>L. gongy/ophorus</i>  | LgLcc9<br>(fer) | JQ307231    | HHHGMFFNSTS-YFDGAQGVSECGI    | GTYWVVAHASGHYVDGLRAPL    | HPFHLHGH  | GVWFFFCHIEWHLEAGLAIQL   |           |
| <i>L. bicolor</i>        | Lcc10           | FJ432093    | HHHGMFFNTTS-WMDGAQGI SECGI   | GTYWVHGHSSGQYVDGLRAPL    | HPFHLHGH  | GVWFLHCHIEWHLEVGLSVQF   |           |
| <i>P. chrysosporium</i>  | Mcc01           | AY225437    | HWHGIPQNGTA-YYDGTAGITECGI    | GTTWVHSHYDTQYTDGVTGAL    | HPFHLHGY  | GAWTLHCHISWHMSAGLLMQF   |           |
| <b>Fet3 consensus</b>    |                 |             | HWHGxxxxxxxx-xMDGxxxxTQCPI   | GTYWYHSHHxxxxQYxDGxRxxFX | HPFHLHGH  | GVWLFCHIEWHLxxGLxxxxL   |           |
|                          |                 |             | A V                          | L                        |           | VA FI D F               |           |
|                          |                 |             |                              |                          |           | M                       |           |

**Table S5.** Gene information for *L. gongylophorus* laccase sequences. Cellular localisation was estimated with TargetP (21, 22).

| <b>Gene</b>   | <b>Cellular localisation</b> | <b>Introns</b> | <b>DNA (bp)</b> | <b>mRNA (bp)</b> | <b>Protein (aa)</b> | <b>Accession codes</b> |
|---------------|------------------------------|----------------|-----------------|------------------|---------------------|------------------------|
| <i>LgLcc1</i> | secretory                    | 13             | 2209            | 1557             | 519                 | JQ307223               |
| <i>LgLcc2</i> | secretory                    | 12             | 2208            | 1587             | 529                 | JQ307224               |
| <i>LgLcc3</i> | secretory                    | 12             | 2259            | 1587             | 529                 | JQ307225               |
| <i>LgLcc4</i> | secretory                    | 12             | 2235            | 1584             | 528                 | JQ307226               |
| <i>LgLcc5</i> | secretory                    | 14             | 2327            | 1560             | 520                 | JQ307227               |
| <i>LgLcc6</i> | secretory                    | 12             | 2238            | 1578             | 526                 | JQ307228               |
| <i>LgLcc7</i> | unknown                      | 13             | 2330            | 1599             | 533                 | JQ307229               |
| <i>LgLcc8</i> | secretory                    | 12             | 2221            | 1569             | 523                 | JQ307230               |
| <i>LgLcc9</i> | secretory                    | 8              | 2426            | 1911             | 637                 | JQ307231               |



**Table S6.** Maximum likelihood estimated dN/dS ratios ( $\omega$ ) for each branch in the tree presented in Figure 3E. *LgLcc1*: *L. gongylophorus*, *TcLcc1*: *Leucocoprinus* sp. cultivated by *T. cornetzi*, *ClLcc1*: *Leucocoprinus* sp. cultivated by *C. longiscapus*, *C. bulleri*: *Lac* from *Cyathus bulleri* (EU195884), *C. comatus*: *Lac2* from *Coprinus comatus* (JQ228449).

| <b>Branch</b>                                 | <b>dN/dS</b> | <b>dN</b> | <b>dS</b> |
|-----------------------------------------------|--------------|-----------|-----------|
| <i>LgLcc1</i> + <i>TcLcc1</i>                 | 0.1490       | 0.0653    | 0.4382    |
| <i>LgLcc1</i>                                 | 0.1392       | 0.0245    | 0.1763    |
| <i>TcLcc1</i>                                 | 0.1327       | 0.0432    | 0.3254    |
| <i>ClLcc1</i>                                 | 4.2038       | 0.0253    | 0.0060    |
| <i>LgLcc1</i> + <i>TcLcc1</i> + <i>ClLcc1</i> | 0.0013       | 0.0802    | 59.9155   |
| <i>C. bulleri</i>                             | 0.6010       | 0.1091    | 0.1815    |
| <i>C. comatus</i>                             | 0.0118       | 0.1001    | 8.4757    |

**Table S7.** Branch-site test of positive selection on specific codon positions among the attine cultivar branches in the tree (Figure 3E) using the outgroup sequences: *Lac2 C. comatus* (JQ228449) and *Lcc C. bulleri* (EU195884) (see table S9). For each branch, likelihood-ratio tests were used to estimate the probability that positive selection has occurred on individual sites on the foreground branch/branches using model A with  $\omega_2$  fixed ( $\omega_2 = 1$ ) or variable ( $\omega_2 > 1$ ) as described in (30). Because several branches in the phylogenetic tree were tested, statistical significance ( $p$ ) was controlled with a Bonferroni correction for multiple comparisons.

| Branch                               | $\ln L$<br>Branch-site model<br>A, with $\omega_2 = 1$ | $\ln L$<br>Branch-site model<br>A, with $\omega_2 > 1$ | $-2\Delta\ln L$ | $p$          | Parameter estimates<br>with significant<br>selection model ( $\omega_2 > 1$ )               |
|--------------------------------------|--------------------------------------------------------|--------------------------------------------------------|-----------------|--------------|---------------------------------------------------------------------------------------------|
| <i>LgLcc1</i>                        | -5591.87                                               | -5591.84                                               | 0.07            | 1.000        |                                                                                             |
| <i>TcLcc1</i>                        | -5590.36                                               | -5588.70                                               | 3.31            | 0.275        |                                                                                             |
| ( <i>LgLcc1</i> +<br><i>TcLcc1</i> ) | -5584.99                                               | -5581.27                                               | <b>7.44</b>     | <b>0.025</b> | $p_0 = 0.795, p_1 = 0.143, p_2$<br>+ $p_3 = 0.062, \omega_0 = 0.039,$<br>$\omega_2 = 6.090$ |
| <i>ClLcc1</i>                        | -5592.08                                               | -5592.06                                               | 0.04            | 1.000        |                                                                                             |

**Table S8.** Codon positions in *LgLcc1* predicted to have a  $dN/dS > 1$  ( $p > 90\%$ ) and details for the significant positions obtained following a branch-site test for positive selection using bayes-empirical-bayes estimation (30). The placement of positively selected codons in the protein structure could not be related to any particular protein region.

| <b>Position</b> | <b>Codon</b>    |
|-----------------|-----------------|
| 109             | S Serine        |
| 378             | E Glutamic acid |
| 410             | S Serine        |
| 512             | S Serine        |

**Table S9.** Branch-site tests of positive selection on specific codon positions among the attine cultivar branches with three different outgroups showing consistent positive selection on the branch subtending the clade of *LgLcc1* and *TcLcc1*. Gene id numbers are given for sequences obtained from the *Agaricus bisporus* genomes: *A. bisporus* var *bisporus* (H97) v2.0 and *A. bisporus* var *burnettii* JB137-S8 available at <http://genome.jgi-psf.org>. Statistical significance (*p*) was adjusted with a Bonferroni correction for multiple comparisons.

| Outgroup                                              | <i>LgLcc1</i> | <i>TcLcc1</i> | ( <i>LgLcc1</i> +<br><i>TcLcc1</i> ) | <i>ClLcc1</i> |
|-------------------------------------------------------|---------------|---------------|--------------------------------------|---------------|
| <i>Lac2 C. comatus</i> (JQ228449)                     | 2ΔlnL=0.07    | 2ΔlnL=3.31    | 2ΔlnL=7.44,                          | 2ΔlnL=0.04    |
| <i>Lcc C. bulleri</i> (EU195884)                      | p=1.000       | p=0.275       | p=0.025                              | p=1.000       |
| -----                                                 |               |               |                                      |               |
| <i>Lac2 C. comatus</i> (JQ228449)                     | 2ΔlnL=1.37    | 2ΔlnL=2.91    | 2ΔlnL=7.42                           | 2ΔlnL=0.01    |
| <i>A. b. var bisporus</i> (184993)                    | p=0.967       | p=0.352       | p=0.026                              | p=1.000       |
| <i>A. b. var burnettii</i> (131729)                   |               |               |                                      |               |
| -----                                                 |               |               |                                      |               |
| <i>Lac2 C. comatus</i> (JQ228449)                     |               |               |                                      |               |
| <i>Lac1 C. comatus</i> (JQ228450)                     |               |               |                                      |               |
| <i>Lcc1d A. b. var. eurotetrasporus</i><br>(FJ898370) |               |               |                                      |               |
| <i>Lcc1 A. bisporus</i> (L10664)                      |               |               |                                      |               |
| <i>Lcc2d A. b. var. eurotetrasporus</i><br>(FJ907540) | 2ΔlnL=1.62    | 2ΔlnL=6.15    | 2ΔlnL=9.70                           | 2ΔlnL=0.00    |
| <i>Lcc2 A. b. var. bisporus</i><br>(FJ838791)         | p=0.814       | p=0.052       | p=0.007                              | p=1.000       |
| <i>Lcc2t A. b. var. eurotetrasporus</i><br>(JN039361) |               |               |                                      |               |
| <i>Lcc1 A. bisporus</i> (L10663)                      |               |               |                                      |               |

**Figures**  
**Figure S1**

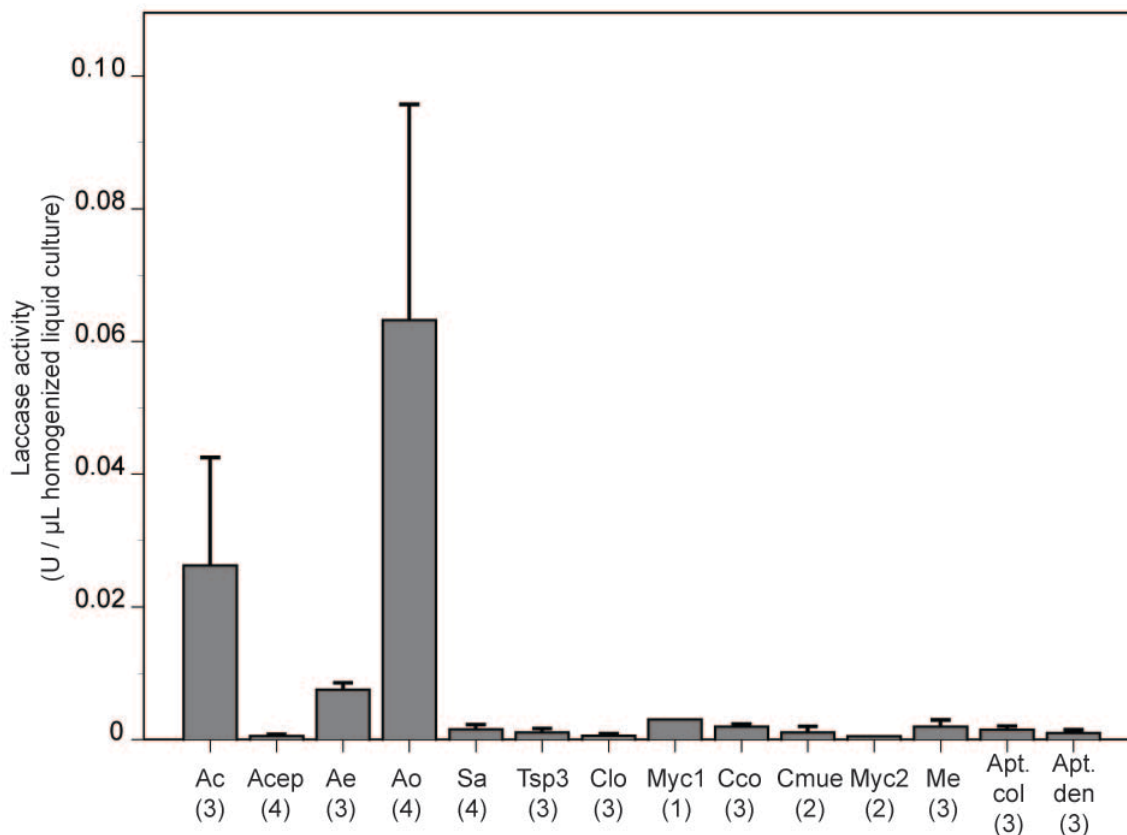

**Figure S1.** Laccase activity (+SE of  $n > 2$ ) of isolated fungal cultivars grown *in-vitro* in liquid potato dextrose broth cultures from 13 species of fungus-growing ants showing high laccase activity in the leaf-cutting ant cultivars except for *A. cephalotes*. Abbreviations used are: Ac=*Atta colombica*, Acep=*A. cephalotes*, Ae=*Acromyrmex echinator*, Ao=*A. octospinosus*, Sa=*Sericomyrmex amabilis*, Tsp1=*Trachymyrmex* sp. 1 cf. *cornetzi*, Tsp3=*T.* sp. 3 “blackhead”, Clo=*Cyphomyrmex longiscapus*, Myc1=*Mycocepurus smithii* (clade 1 cultivar), Cco=*C. costatus*, Cmue=*C. muelleri*, Myc2=*M. smithii* (clade 2 cultivar), Me=*Myrmicocrypta ednaella* (clade 2 cultivar), Apt.col=*Apterostigma collare*, Apt.den=*A. dentigerum*. The numbers of fungal isolates assayed are given in parentheses.

Figure S2

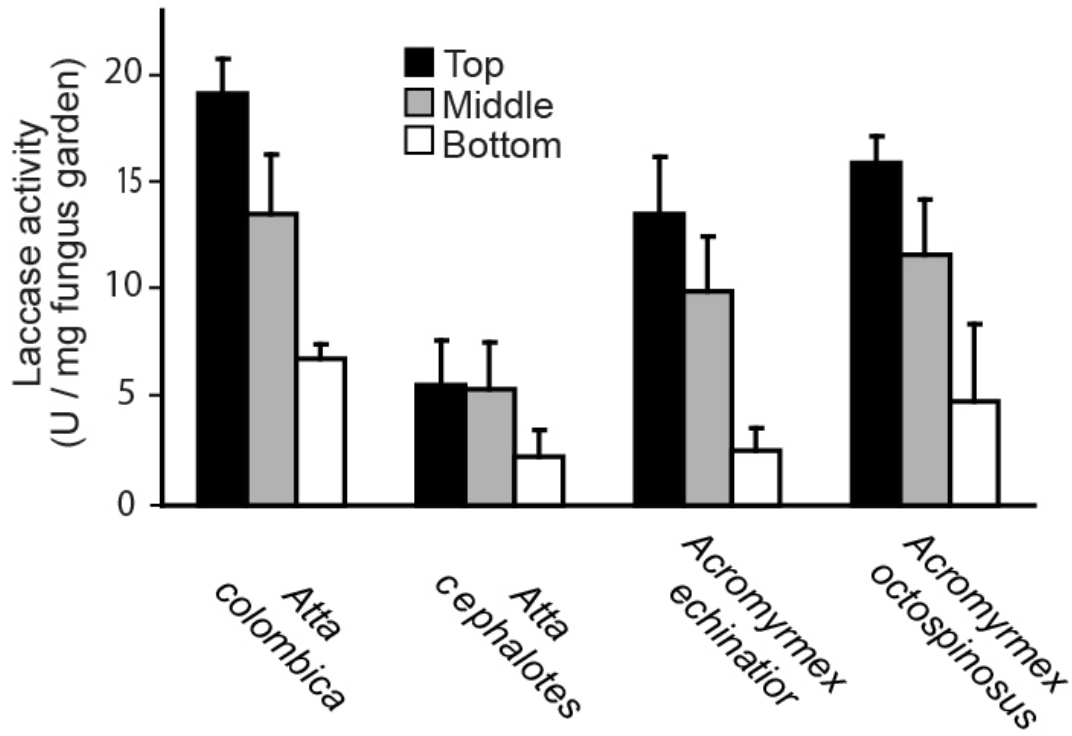

**Figure S2.** Laccase activity (U/mg±SE) in the top, middle and bottom sections of three laboratory fungus gardens of four common Panamanian leaf-cutting ant species showing that laccase activity decreases from top to bottom (ANOVA:  $F_{2,24} = 19.23$ ,  $p < 0.0001$ ). *A. cephalotes* gardens have a lower overall laccase activity than the other three species tested, which resulted in a significant ANOVA interaction term between fungus garden sections and leaf-cutting ant species (ANOVA:  $F_{9,24} = 3.50$ ,  $p = 0.0067$ ).

**Figure S3**

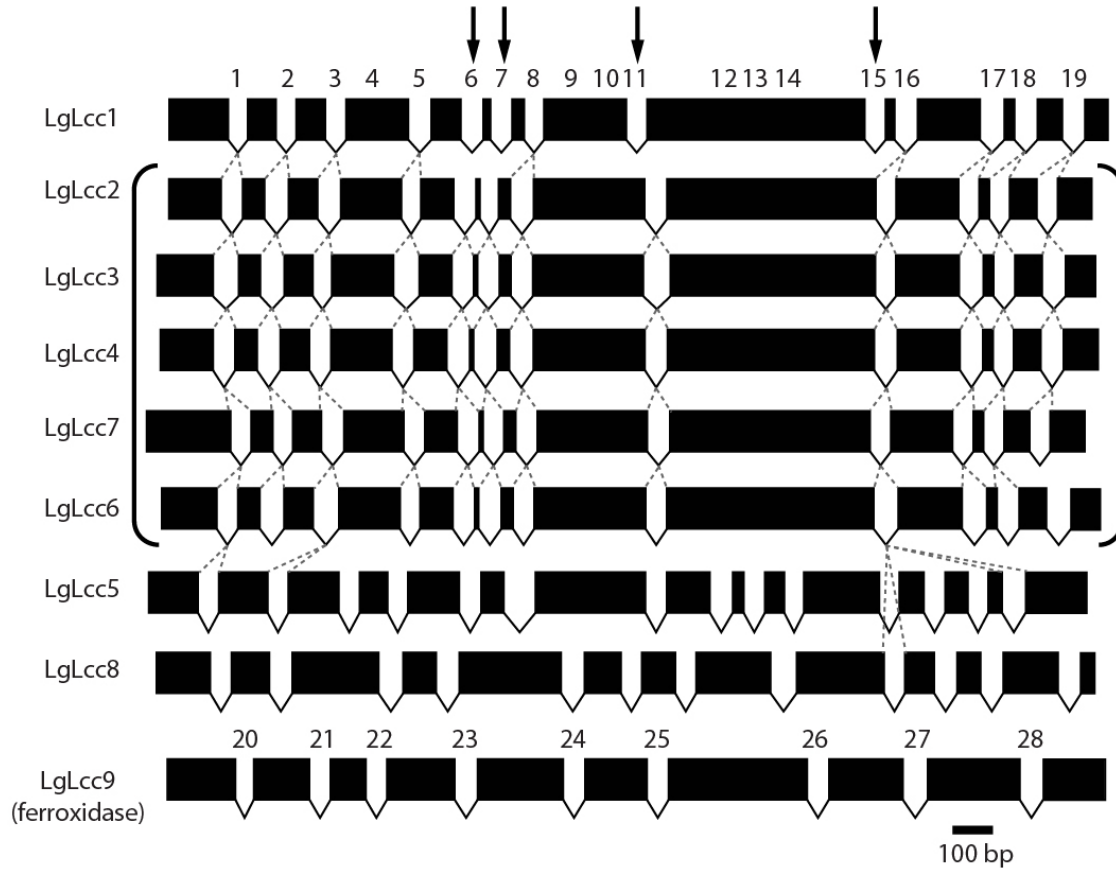

**Figure S3.** Intron-exon structure of the 9 laccase-coding genes. Intron-exon boundaries that occur at similar base pair positions between gene copies are connected with dotted lines. The four arrows indicate the four introns where *LgLcc1* is different compared to the five *LgLcc* sequences (*LgLcc2,3,4,6,7*) that have nearly identical intron-exon structure (marked in brackets).

Figure S4

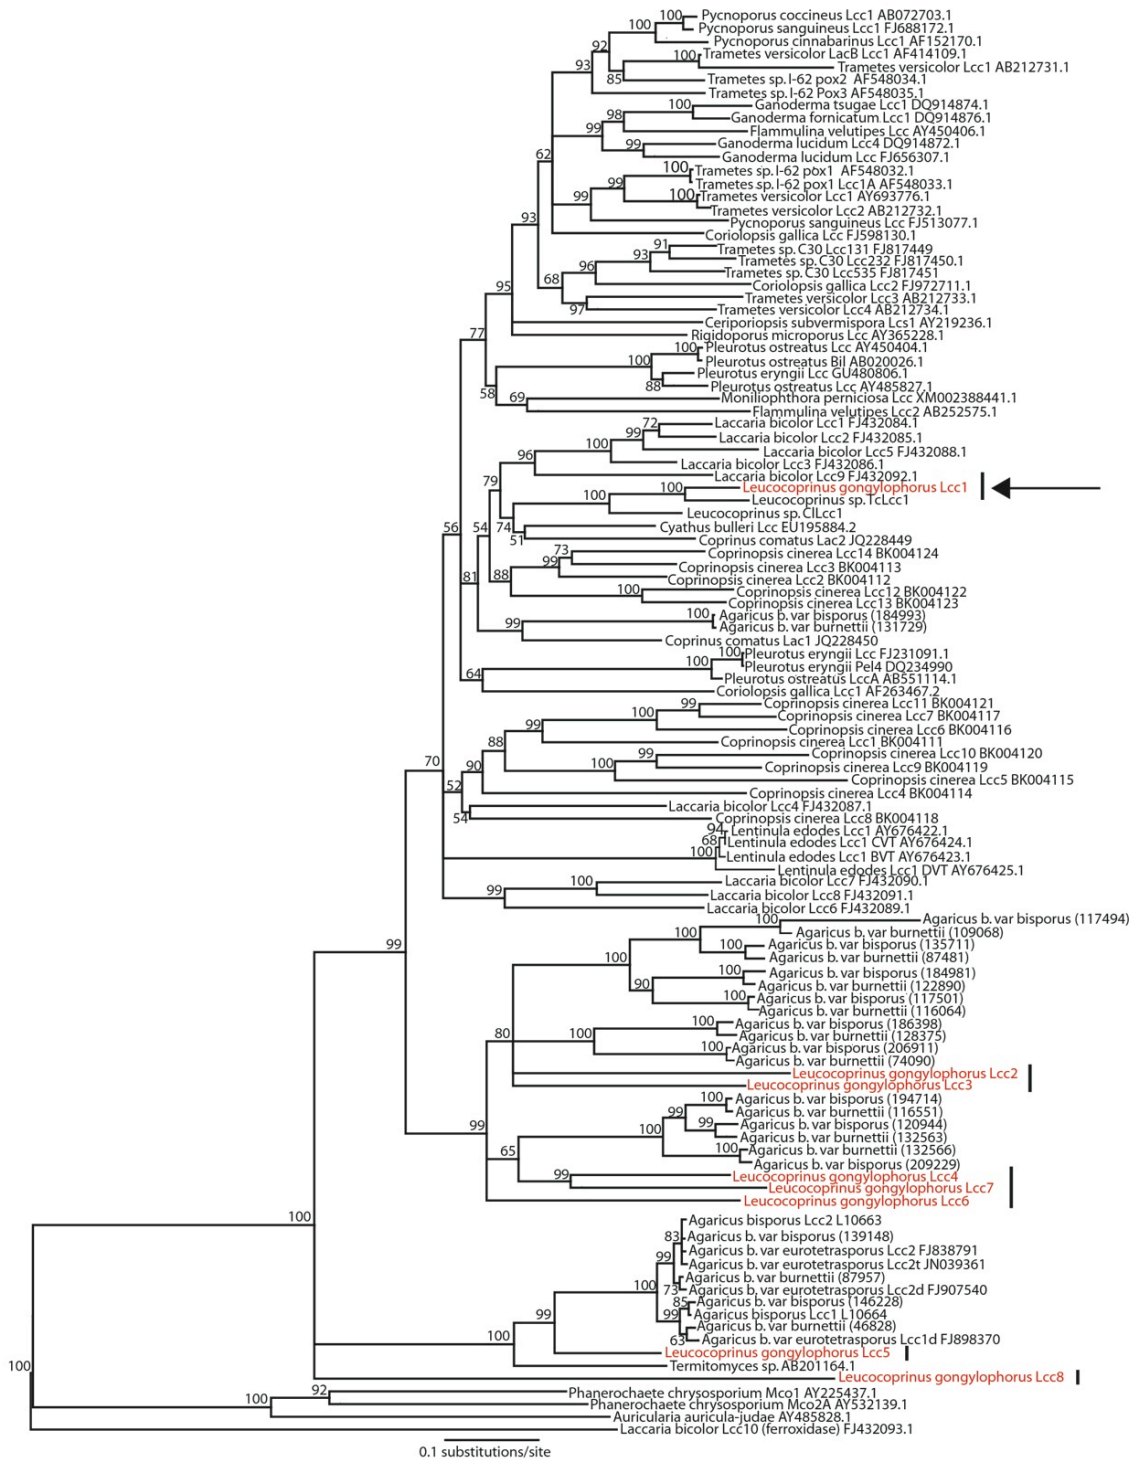

**Figure S4.** Neighbour Joining tree of Basidiomycete laccase amino-acid sequences. The eight *L. gongylophorus* laccase sequences are marked in red and the arrow indicates *LgLcc1*. Branch support was estimated by 10,000 bootstrap replications and the tree rooted with the ferroxidase *Lcc10* from *L. bicolor*. Gene id numbers are given for sequences obtained from the *Agaricus bisporus* genomes: *A. bisporus* var *bisporus* (H97) v2.0 and *A. bisporus* var *burnettii* JB137-S8.



Figure S5

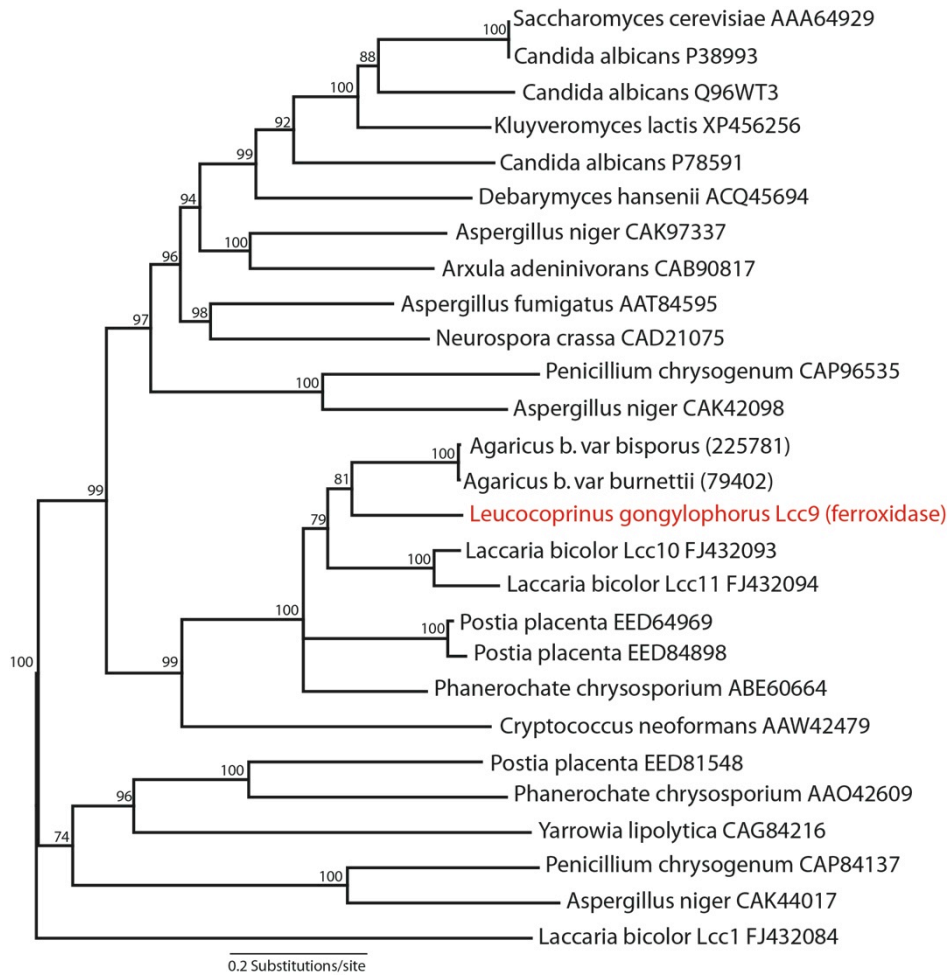

**Figure S5.** Neighbour Joining tree of Basidiomycete ferroxidase amino-acid sequences. The *L. gongylophorus* ferroxidase sequence (*LgLcc9*) is marked in red. Branch support was estimated by 10,000 bootstrap replications and the tree was rooted with the laccase *Lcc1* from *L. bicolor*.

**Figure S6**

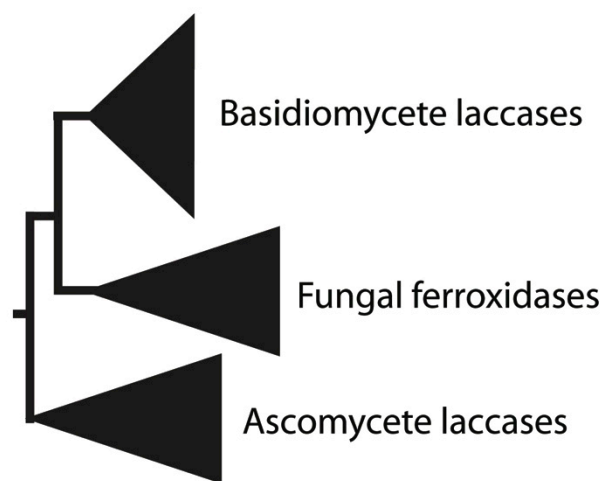

**Figure S6.** Schematic tree showing the relationship between fungal laccases and ferroxidases after Courty et al. (43).

**Figure S7 (Next page).** Tertiary structure of the putative substrate binding region of *LgLcc1*. **A.** Protein model of *LgLcc1* with the four substrate-binding regions (loops I-IV) highlighted in blue, green, red and yellow. **B.** Partial protein alignment of *LgLcc1* (numbers refer to amino acid positions) with the higher and lower attine fungal homologs (*TcLcc1* and *ClLcc1*) and similar laccase sequences from: 1. The non-symbiotic free-living basidiomycetes: *Cyathus bulleri* (*C.b.*) (ABW75771) and *Coprinus comatus* (*C.c.*) (JQ228449), and 2. The free-living basidiomycete *Trametes versicolor* (*T.v.*) (PDB acc. code: 1KYA) and ascomycete *Melanocarpus albomyces* (*M.a.*) (PDB acc. code: 1GW0) for which secondary structures are known so substrate binding regions can be predicted. Conserved amino acids in direct contact with the substrate, as determined by x-ray crystallography to construct 1KYA and 1GW0 are highlighted in bold-face print with grey shading.

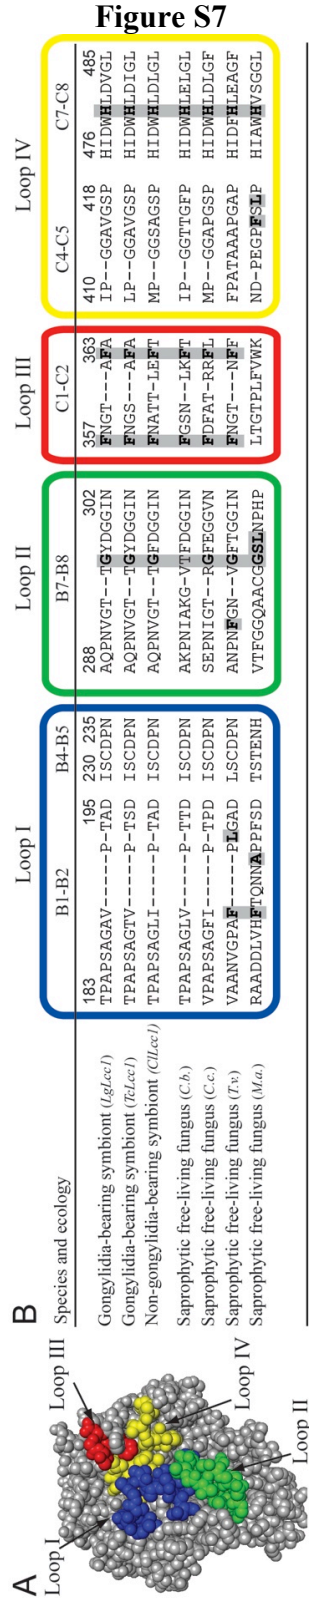

**Figure S7**

Figure S8

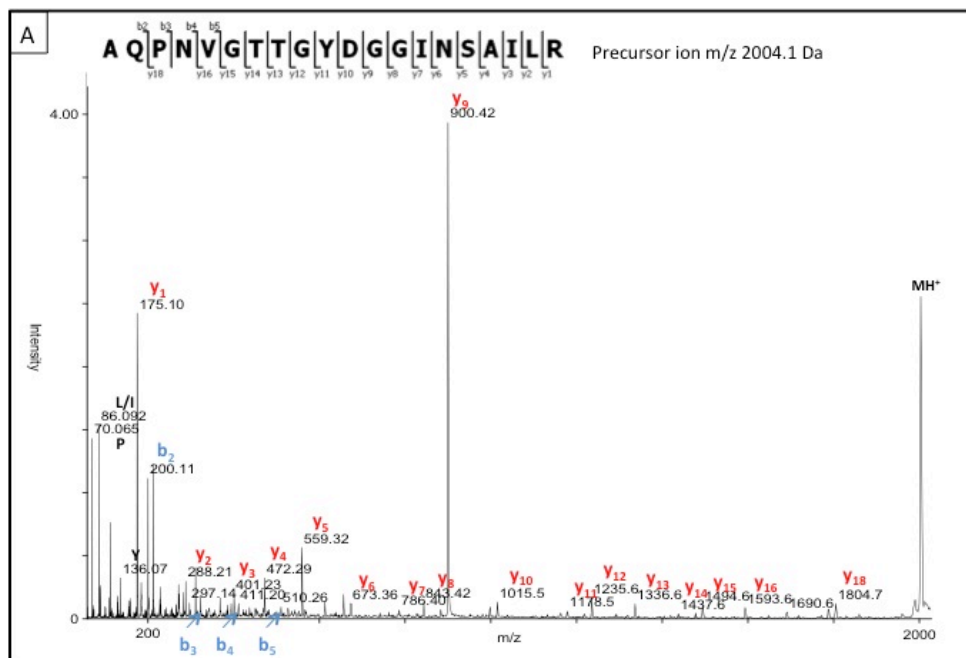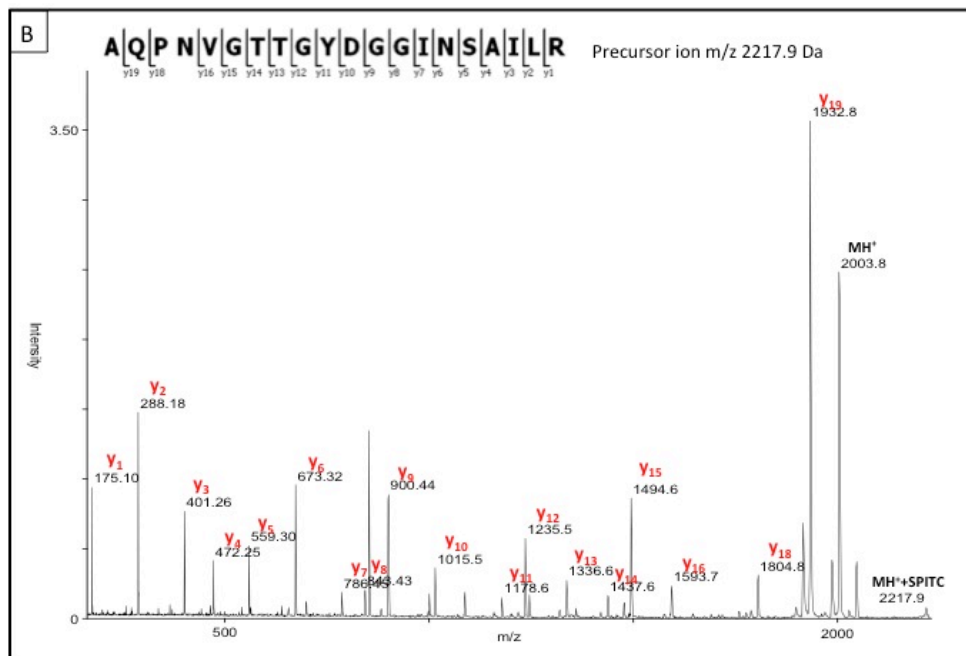

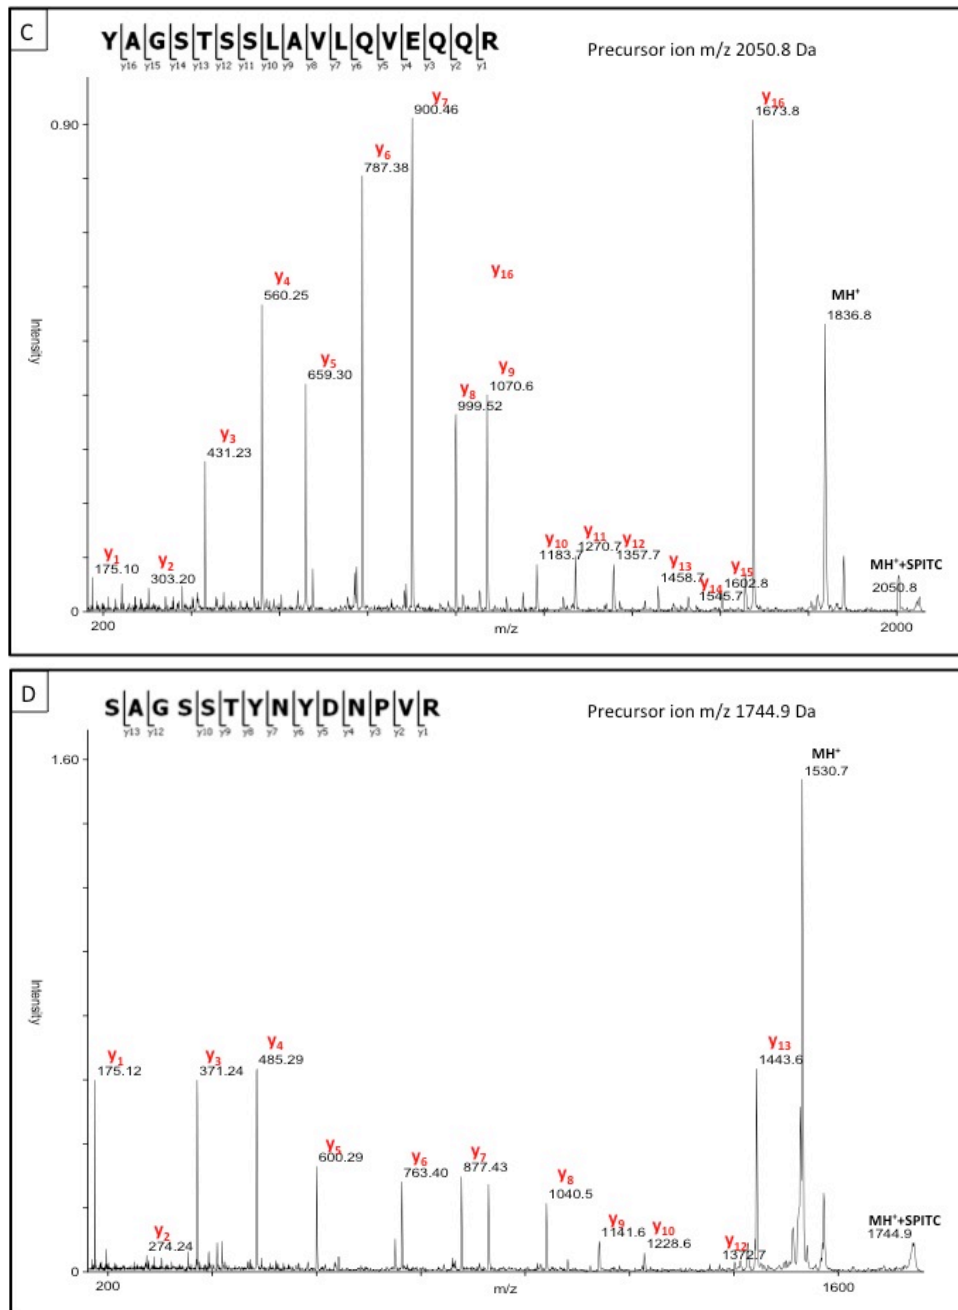

**Figure S8.** Mass spectrometry based *de novo* sequencing of Laccase peptides. The annotated MALDI MS/MS fragmentation spectra of the precursor ions: **A.** m/z 2004.1 Da; **B.** m/z 2217.9 Da, derivatised with SPITC; **C.** m/z 2050.8 Da, derivatised with SPITC; **D.** m/z 1744.9 Da, derivatised with SPITC. Precursor ions MH<sup>+</sup>, fragment ions of types y and b, and immonium ions are marked in the spectrum, and the deduced sequence and fragment ions used for the calculations are given for each precursor ion. The mass spectrometry analysis does not allow distinction between I and L and between Q and K. The assignment of correct amino acid residues has therefore been based on the results obtained from DNA sequencing.
